# Supplementary material
Source: ML conference proceedings conference paper supplement (https://proceedings.neurips.cc/paper_files/paper/2023/hash/a07e87ecfa8a651d62257571669b0150-Abstract.html)
Supplement: Supplementary file 1 [file a07e87ecfa8a651d62257571669b0150-Supplemental-Conference.pdf]

# Appendix

## Table of Contents

|                                                         |           |
|---------------------------------------------------------|-----------|
| <b>A Fully interactive model</b>                        | <b>13</b> |
| A.1 Lower Bounds under Full Interactive Model . . . . . | 14        |
| <b>B A measure change bound</b>                         | <b>15</b> |
| <b>C Upper bounds</b>                                   | <b>16</b> |
| C.1 Product Bernoulli Distributions . . . . .           | 16        |
| C.2 Gaussian Mean Estimation . . . . .                  | 21        |
| <b>D Relation to other lower bound methods</b>          | <b>22</b> |
| D.1 Strong data processing inequalities . . . . .       | 22        |
| D.2 Connection to the van Trees inequality . . . . .    | 23        |
| <b>E Missing proofs in Section Section 3</b>            | <b>24</b> |
| E.1 Proof of Theorem 1 . . . . .                        | 24        |
| E.2 Proof of Theorem 2 . . . . .                        | 27        |
| E.3 Proof of Corollary 1 . . . . .                      | 28        |
| E.4 Proof of Corollary 2 . . . . .                      | 28        |
| <b>F Missing proofs in Section 4</b>                    | <b>29</b> |
| F.1 Proof of Lemma 1 . . . . .                          | 29        |
| <b>G Missing statements and proofs in Section 5</b>     | <b>29</b> |
| G.1 Proof of Theorem 3 . . . . .                        | 29        |
| G.2 Detailed results for Gaussian family . . . . .      | 31        |
| G.3 Detailed results for discrete family . . . . .      | 33        |

## A Fully interactive model

In this appendix, we describe how to extend our results, presented in the sequentially interactive model, to the more general interactive setting. We first formally define this setting and the corresponding notion of protocols. Hereafter, we use  $*$  for the Kleene star operation, i.e.,  $V^* = \bigcup_{n=0}^{\infty} V^n$ .

**Definition 4** (Interactive Protocols). Let  $X_1, \dots, X_n$  be i.i.d. samples from  $\mathbf{p}_\theta$ ,  $\theta \in \Theta$ , and  $\mathcal{W}^*$  be a collection of sequences of pairs of channel families and players; that is, each element of  $\mathcal{W}^*$  is a sequence  $(\mathcal{W}_t, j_t)_{t \in \mathbb{N}}$  where  $j_t \in [n]$ . An *interactive protocol*  $\Pi$  using  $\mathcal{W}^*$  comprises a random variable  $U$  (independent of the input  $X_1, \dots, X_n$ ) and, for each  $t \in \mathbb{N}$ , mappings

$$\begin{aligned}\sigma_t &: Y_1, \dots, Y_{t-1}, U \mapsto N_t \in [n] \cup \{\perp\} \\ g_t &: Y_1, \dots, Y_{t-1}, U \mapsto W_t\end{aligned}$$

with the constraint that  $((W_1, N_1), \dots, (W_t, N_t))$  must be consistent with some sequence from  $\mathcal{W}^*$ ; that is, there exists  $((\mathcal{W}_s, j_s))_{s \in \mathbb{N}} \in \mathcal{W}^*$  such that  $W_s \in \mathcal{W}_s$  and  $N_s = j_s$  for all  $1 \leq s \leq t$ . These two mappings respectively indicate (i) whether the protocol is to stop (symbol  $\perp$ ), and, if not, which player is to speak at round  $t \in \mathbb{N}$ , and (ii) which channel this player selects at this round.

In round  $t$ , if  $N_t = \perp$ , the protocol ends. Otherwise, player  $N_t$  (as selected by the protocol, based on the previous messages) uses the channel  $W_t$  to produce the message (output)  $Y_t$  according to the probability measure  $W_t(\cdot \mid X_{N_t})$ . We further require that  $T := \inf \{ t \in \mathbb{N} : N_t = \perp \}$  is finite a.s. The messages  $Y^T = (Y_1, \dots, Y_T)$  received by the referee and the public randomness  $U$  constitute the *transcript* of the protocol  $\Pi$ .

538 In other terms, the channel used by the player  $N_t$  speaking at time  $t$  is a Markov kernel

$$W_t: \mathfrak{Y}_t \times \mathcal{X} \times \mathcal{Y}^{t-1} \rightarrow [0, 1],$$

539 with  $\mathcal{Y}_t \subseteq \mathcal{Y}$ ; and, for player  $j \in [n]$ , the allowed subsequences  $(\mathcal{W}_t, j_t)_{t \in \mathbb{N}: j_t = j}$  capture the possible  
 540 sequences of channels allowed to the player. As an example, if we were to require that any single  
 541 player can speak at most once, then for every  $j \in [n]$  and every  $(\mathcal{W}_t, j_t)_{t \in \mathbb{N}} \in \mathcal{W}^n$ , we would have  
 542  $\sum_{t=1}^{\infty} \mathbb{1}\{j_t = j\} \leq 1$ .

543 In the interactive model, we can then capture the constraint that each player must communicate at  
 544 most  $\ell$  bits in total by letting  $\mathcal{W}^n$  be the set of sequences  $(\mathcal{W}_t^{\text{comm}, \ell_t}, j_t)_{t \in \mathbb{N}}$  such that

$$\forall j \in [n], \quad \sum_{t=1}^{\infty} \ell_t \cdot \mathbb{1}\{j_t = j\} \leq \ell.$$

545 In the simpler sequentially interactive model, this condition simply becomes the choice of  $\mathcal{W}^n =$   
 546  $(\mathcal{W}^{\text{comm}, \ell}, \dots, \mathcal{W}^{\text{comm}, \ell})$ .

### 547 A.1 Lower Bounds under Full Interactive Model

548 Next we discuss how our technique extends to the full interactive model. For any full interactive  
 549 protocol  $\Pi$ , let  $Y^* \in \mathcal{Y}^*$  be the message sequence generated by the protocol. Then, for all  $y^* \in \mathcal{Y}^*$ ,  
 550 we have

$$\Pr_{X^n \sim \mathbf{p}}[Y^* = y^*] = \mathbb{E}_{X^n \sim \mathbf{p}} \left[ \prod_{t=1}^{\infty} W_t(y_t \mid X_{\sigma_t(y^{t-1})}, y^{t-1}) \right].$$

551 The following lemma states that if  $X^n$  are generated from a product distribution, the distribution of  
 552 the transcript satisfies a property similar to the “cut-and-paste” property from [6].

553 **Lemma 2 ([20]).** *If  $X^n \sim \mathbf{p} = \otimes_{t=1}^n \mathbf{p}_t$ , the transcript of the protocol satisfies*

$$\Pr_{X^n \sim \mathbf{p}}[Y^* = y^*] = \prod_{t=1}^n \mathbb{E}_{X_t \sim \mathbf{p}_t}[g_t(y^*, X_t)], \quad (16)$$

554 where  $g_t(y^*, x_t) = \prod_{j=1}^{\infty} W_j(y_j \mid x_t, y^{j-1}) \mathbb{1}\{\sigma_j(y^{j-1}) = t\}$ .

555 Hence, when  $X^n \sim \mathbf{p}_z^{\otimes n}$  we have

$$\mathbf{p}_z^{y^*} := \Pr_{X^n \sim \mathbf{p}_z^{\otimes n}}[Y^* = y^*] = \prod_{t=1}^n \mathbb{E}_{X_t \sim \mathbf{p}_z}[g_t(y^*, X_t)].$$

556 Here we can define a similar notion of “channel” for a communication protocol  $\Pi$  for the  $i$ th player  
 557 when the underlying distribution is  $\mathbf{p}_z$  by setting

$$\tilde{W}_{t, \mathbf{p}_z}(y^* \mid x) = g_t(y^*, x) \left( \prod_{j \neq t} \mathbb{E}_{X_j \sim \mathbf{p}_z}[g_j(y^*, X_j)] \right). \quad (17)$$

558 Then we have, for all  $t \in [n]$ ,

$$\mathbb{E}_{X_t \sim \mathbf{p}_z}[\tilde{W}_{t, \mathbf{p}_z}(y^* \mid X_t)] = \Pr_{X^n \sim \mathbf{p}_z^{\otimes n}}[Y^* = y^*].$$

559 We proceed to prove a bound similar to Theorem 1 in terms of the “channel” defined in Eq. (17), as  
 560 stated below.

561 **Theorem 4** (Information contraction bound). *Fix  $\tau \in (0, 1/2]$ . Let  $\Pi$  be a fully interactive pro-*  
 562 *cedure using  $\mathcal{W}^n$ , and let  $Z$  be a random variable on  $\mathcal{Z}$  with distribution  $\text{Rad}(\tau)^{\otimes k}$ . Let  $(Y^*, U)$*   
 563 *be the transcript of  $\Pi$  when the input  $X_1, \dots, X_n$  is i.i.d. with common distribution  $\mathbf{p}_Z$ . Then,*  
 564 *under Assumption 1,*

$$\begin{aligned} & \left( \frac{1}{k} \sum_{i=1}^k d_{\text{TV}}(\mathbf{p}_{+i}^{Y^*}, \mathbf{p}_{-i}^{Y^*}) \right)^2 \\ & \leq \frac{7}{k} \alpha^2 \sum_{j=1}^n \max_{z \in \mathcal{Z}} \max_{(\mathcal{W}_t, j_t)_{t \in \mathbb{N}} \in \mathcal{W}^n} \sum_{i=1}^k \int_{y^* \in \mathcal{Y}^*} \frac{\mathbb{E}_{\mathbf{p}_z}[\phi_{z,i}(X) \tilde{W}_{j, \mathbf{p}_z}(y^* \mid X)]^2}{\mathbb{E}_{\mathbf{p}_z}[\tilde{W}_{j, \mathbf{p}_z}(y^* \mid X)]} d\mu, \end{aligned}$$

565 where  $\mathbf{p}_{+i}^{Y^*} := \mathbb{E}[\mathbf{p}_Z^{Y^*} \mid Z_i = 1]$ ,  $\mathbf{p}_{-i}^{Y^*} := \mathbb{E}[\mathbf{p}_Z^{Y^*} \mid Z_i = -1]$ .

566 We can see the bound is in identical form to Theorem 1 except that we replace each player's channel  
 567 with the  $\tilde{W}_{j,\mathbf{p}_z}(y^* \mid X)$  we defined. Other similar bounds in Section 3 can also be derived under  
 568 additional assumptions and specific constraints. We present the proof for Theorem 4 below and omit  
 569 the detailed statements and proof for other bounds.

570 *Proof.* Analogously to Eq. (33), we can get

$$\frac{1}{k} \left( \sum_{i=1}^k d_{\text{TV}}(\mathbf{p}_{+i}^{Y^*}, \mathbf{p}_{-i}^{Y^*}) \right)^2 \leq 14 \sum_{t=1}^n \mathbb{E}_Z \left[ \sum_{i=1}^k d_{\text{H}}(\mathbf{p}_Z^{Y^*}, \mathbf{p}_{t \leftarrow Z \oplus i}^{Y^*})^2 \right] \quad (18)$$

571 For all  $z \in \{-1, +1\}^k$  and  $i, t$ , by the definition of Hellinger distance and Eq. (16), we have

$$\begin{aligned} 2d_{\text{H}}(\mathbf{p}_z^{Y^*}, \mathbf{p}_{t \leftarrow z \oplus i}^{Y^*})^2 &= \int_{y^* \in \mathcal{Y}^*} \prod_{\substack{1 \leq j \leq n \\ j \neq t}} \mathbb{E}_{X_j \sim \mathbf{p}_z} [g_j(y^*, X_j)] \left( \sqrt{\mathbb{E}_{X_t \sim \mathbf{p}_{z \oplus i}} [g_t(y^*, X_t)]} - \sqrt{\mathbb{E}_{X_t \sim \mathbf{p}_z} [g_t(y^*, X_t)]} \right)^2 d\mu \\ &\leq \int_{y^* \in \mathcal{Y}^*} \left( \prod_{j \neq t} \mathbb{E}_{X_j \sim \mathbf{p}_z} [g_j(y^*, X_j)] \right) \left( \frac{(\mathbb{E}_{X_t \sim \mathbf{p}_z} [g_t(y^*, X_t)] - \mathbb{E}_{X_t \sim \mathbf{p}_{z \oplus i}} [g_t(y^*, X_t)])^2}{\mathbb{E}_{X_t \sim \mathbf{p}_z} [g_t(y^*, X_t)]} \right) d\mu, \end{aligned}$$

572 Proceeding from above, we get under Assumption 1,

$$\begin{aligned} 2d_{\text{H}}(\mathbf{p}_z^{Y^*}, \mathbf{p}_{t \leftarrow z \oplus i}^{Y^*})^2 &\leq \alpha^2 \int_{y^* \in \mathcal{Y}^*} \left( \prod_{j \neq t} \mathbb{E}_{X_j \sim \mathbf{p}_z} [g_j(y^*, X_j)] \right) \left( \frac{\mathbb{E}_{X_t \sim \mathbf{p}_z} [\phi_{z,i}(X_t) g_t(y^*, X_t)]^2}{\mathbb{E}_{X_t \sim \mathbf{p}_z} [g_t(y^*, X_t)]} \right) d\mu \\ &= \alpha^2 \int_{y^* \in \mathcal{Y}^*} \frac{\mathbb{E}_{X_t \sim \mathbf{p}_z} [\phi_{z,i}(X_t) g_t(y^*, X_t) \prod_{j \neq t} \mathbb{E}_{X_j \sim \mathbf{p}_z} [g_j(y^*, X_j)]]^2}{\mathbb{E}_{X_t \sim \mathbf{p}_z} [g_t(y^*, X_t)] \prod_{j \neq t} \mathbb{E}_{X_j \sim \mathbf{p}_z} [g_j(y^*, X_j)]} d\mu \\ &= \alpha^2 \int_{y^* \in \mathcal{Y}^*} \frac{\mathbb{E}_{X_t \sim \mathbf{p}_z} [\phi_{z,i}(X_t) \tilde{W}_{t,\mathbf{p}_z}(y^* \mid X)]^2}{\mathbb{E}_{X_t \sim \mathbf{p}_z} [\tilde{W}_{t,\mathbf{p}_z}(y^* \mid X)]} d\mu. \end{aligned}$$

573 Plugging the above bound into Eq. (18), we can obtain the bound in Theorem 4 by taking the  
 574 maximum over all  $z \in \{-1, +1\}^k$  and all possible channel sequences.  $\square$

## 575 B A measure change bound

576 We here provide a variant of Talagrand's transportation-cost inequality which is used in deriv-  
 577 ing Eq. (5) (under Assumption 3) in the second part of Theorem 2. We note that this type of result  
 578 is not novel, and can be derived from standard arguments in the literature (see, e.g., [9, Chapter 8]  
 579 or [27, Chapter 4]). However, the lemma below is specifically tailored for our purposes, and we  
 580 provide the proof for completeness. A similar bound was derived in [2], where Gaussian mean testing  
 581 under communication constraints was considered.

582 **Lemma 3** (A measure change bound). *Consider a random variable  $X$  taking values in  $\mathcal{X}$  and with*  
 583 *distribution  $P$ . Let  $\Phi: \mathcal{X} \rightarrow \mathbb{R}^k$  be such that the random vector  $\Phi(X)$  is  $\sigma^2$ -subgaussian. Then, for*  
 584 *any function  $a: \mathcal{X} \rightarrow [0, \infty)$  such that  $\mathbb{E}[a(X)] < \infty$ , we have*

$$\frac{\|\mathbb{E}[\Phi(X)a(X)]\|_2^2}{\mathbb{E}[a(X)]^2} \leq 2\sigma^2 \frac{\mathbb{E}[a(X) \ln a(X)]}{\mathbb{E}[a(X)]} + 2\sigma^2 \ln \frac{1}{\mathbb{E}[a(X)]}.$$

585 *Proof.* By an application of Gibb's variational principle (cf. [9, Corollary 4.14]) the following holds:  
 586 For a random variable  $Z$  and distributions  $P$  and  $Q$  on the underlying probability space satisfying  
 587  $Q \ll P$  (that is, such that  $Q$  is absolutely continuous with respect to  $P$ ), we have

$$\lambda \mathbb{E}_Q[Z] \leq \ln \mathbb{E}_P[e^{\lambda Z}] + D(Q \| P).$$

588 To apply this bound, set  $P$  to be the distribution of  $X$  and let  $Q \ll P$  be defined using its density  
 589 (Radon–Nikodym derivative) with respect to  $P$  given by

$$\frac{dQ}{dP} = \frac{a(X)}{\mathbb{E}_P[a(X)]}.$$

590 Now, note that for any unit vector  $v$ , we have, setting  $Z = v^\top \Phi(X)$  and using the  $\sigma^2$ -subgaussianity  
 591 of  $\Phi(X)$ , that

$$\lambda \mathbb{E}_Q[v^\top \Phi(X)] \leq \ln \mathbb{E}_P[e^{\lambda v^\top \Phi(X)}] + D(Q\|P) \leq \frac{\sigma^2 \lambda^2}{2} + D(Q\|P).$$

592 In particular, for  $\lambda = \frac{1}{\sigma} \sqrt{2D(Q\|P)}$ , we get

$$\mathbb{E}_Q[v^\top \Phi(X)] \leq \sigma \sqrt{2D(Q\|P)}.$$

593 Applying this to the unit vector  $v := \frac{\mathbb{E}_Q[\Phi(X)]}{\|\mathbb{E}_Q[\Phi(X)]\|_2}$  then yields

$$\|\mathbb{E}_Q[\Phi(X)]\|_2 \leq \sigma \sqrt{2D(Q\|P)}.$$

594 To conclude, it then suffices to observe that

$$D(Q\|P) = \frac{\mathbb{E}_P[a(X) \ln a(X)]}{\mathbb{E}_P[a(X)]} + \ln \frac{1}{\mathbb{E}_P[a(X)]}.$$

595 The proof is completed by combining the bounds above, as  $\mathbb{E}_Q[\Phi(X)] = \frac{\mathbb{E}_P[\Phi(X)a(X)]}{\mathbb{E}_P[a(X)]}$ .  $\square$

## 596 C Upper bounds

597 We now describe and analyze the interactive algorithms for the estimation tasks we consider.

### 598 C.1 Product Bernoulli Distributions

599 Recall that  $\mathcal{B}_{d,s}$ , the family of  $d$ -dimensional  $s$ -sparse product Bernoulli distributions, is defined as

$$\mathcal{B}_{d,s} := \left\{ \bigotimes_{j=1}^d \text{Rad}\left(\frac{1}{2}(\mu_j + 1)\right) : \mu \in [-1, 1]^d, \|\mu\|_0 \leq s \right\}. \quad (19)$$

600 We now provide the interactive protocols achieving the upper bounds of Theorem 3 for sparse product  
 601 Bernoulli mean estimation under LDP and communication constraints.

602 Our protocols has two ingredients described below:

- 603 • **Estimating non-zero mean coordinates.** In this step we will start with  $S_0 = [d]$ , the set of  
 604 all possible coordinates. Then we will iteratively prune the set  $S_0 \rightarrow S_1 \rightarrow \dots \rightarrow S_T$ , such  
 605 that  $|S_T| = 3s$  (this step is skipped if  $s \geq d/3$ ) is a good estimate for the set of coordinates  
 606 with non-zero mean.
- 607 • **Estimating the non-zero means.** We then estimate the means of the coordinates in  $S_T$ ,  
 608 which is equivalent to solving a dense mean estimation problem in  $3s$  dimensions.

609 In the next two sections, we provide the details of the algorithm that matches the lower bounds  
 610 obtained in Section 5 for interactive protocols under LDP and communication constraints respectively.

#### 611 C.1.1 LDP constraints

612 In this subsection, we will focus on the case  $\varepsilon \in (0, 1]$  (high-privacy regime). For the case  $\varepsilon > 1$ ,  
 613 we rely a privatization of the communication-limited algorithm, which will be discussed at the end  
 614 of Appendix C.1.2. Our protocol for Bernoulli mean estimation under LDP constraints is described  
 615 in Algorithm 1. As stated above, in each round  $t = 1, \dots, T$ , for each  $j \in S_{t-1}$  a new group of  
 616 players apply the well known binary Randomized Response (RR) mechanism [29, 24] to their  $j$ th

coordinate. Using these messages we then guess a set of coordinates with highest possible means (in absolute value) and prune the set to  $S_t$ . This is done in Lines 2-6 of Algorithm 1.

In Lines 7-12, the algorithm uses the same approach to estimate the means of coordinates within  $S_T$  and sets remaining coordinates to zero.

The privacy guarantee follows immediately from that of the RR mechanism, and further, this only requires one bit of communication per player.

---

**Algorithm 1** LDP protocol for mean estimation for the product of Bernoulli family

---

**Require:**  $n$  players, dimension  $d$ , sparsity parameter  $s$ , privacy parameter  $\varepsilon$ .

- 1: Set  $T := \log_3 \frac{d}{3s}$ ,  $\alpha := \frac{e^\varepsilon}{1+e^\varepsilon}$ ,  $S_0 = [d]$ ,  $N_0 := \frac{n}{6d}$ .
- 2: **for**  $t = 1, 2, \dots, T$  **do**
- 3:     **for**  $j \in S_{t-1}$  **do**
- 4:         Get a group of new players  $G_{t,j}$  of size  $N_t = N_0 \cdot 2^t$ .
- 5:         Player  $i \in G_{t,j}$ , upon observing  $X_i \in \{-1, +1\}^d$  sends the message  $Y_i \in \{-1, +1\}$  such that

$$Y_i = \begin{cases} (X_i)_j & \text{w.p. } \alpha, \\ -(X_i)_j & \text{w.p. } 1 - \alpha. \end{cases} \quad (20)$$

- 6:         Set  $M_{t,j} := \sum_{i \in G_{t,j}} Y_i$ . Let  $S_t \subseteq S_{t-1}$  be the set of the  $|S_{t-1}|/3$  indices with the largest  $|M_{t,j}|$ .
- 7:     **for**  $j \in S_T$  **do**
- 8:         Get a group of new players  $G_{T,j}$ ,  $j \in S_T$  of size  $N_{T+1} = N_0 \cdot 2^T$ .
- 9:         Player  $i \in G_{T,j}$ , sends the message  $Y_i \in \{-1, +1\}$  according to Eq. (20) and  $M_{T,j} := \sum_{i \in G_{T,j}} Y_i$
- 10:    **for**  $j \in [d]$  **do**
- 11:

$$\hat{\mu}_j = \begin{cases} \frac{M_{j,T}}{(2\alpha-1)N_{T+1}} & \text{if } j \in S_T, \\ 0 & \text{otherwise.} \end{cases}$$

12: **return**  $\hat{\mu}$ .

---

The performance guarantee of Algorithm 1 is stated below, which matches the lower bounds obtained in Section 5.

**Proposition 1.** Fix  $p \in [1, \infty]$ . For  $n \geq 1$  and  $\varepsilon \in (0, 1]$ , Algorithm 1 is an  $(n, \gamma)$ -estimator using  $\mathcal{W}_\varepsilon$  under  $\ell_p$  loss for  $\mathcal{B}_{d,s}$  with  $\gamma = O\left(\sqrt{\frac{pds^{2/p}}{n\varepsilon^2}}\right)$  for  $p \leq 2 \log s$  and  $\gamma = O\left(\sqrt{\frac{d \log s}{n\varepsilon^2}}\right)$  for  $p > 2 \log s$ .

*Proof.* The total number of players used by Algorithm 1 uses is

$$\sum_{t=1}^{T+1} |S_{t-1}| \cdot N_t = |S_0| \cdot N_0 \cdot \sum_{t=1}^{T+1} \frac{2^t}{3^{t-1}} \leq 6|S_0| \cdot N_0 = n.$$

To prove the utility guarantee, we bound the estimation error in the estimated set  $S_T$  and the error outside the set  $S_T$  in the following lemma.

**Lemma 4.** Let  $S_T$  be the subset obtained from the first stage of Algorithm 1. Then,

$$\max \left\{ \mathbb{E} \left[ \sum_{j \notin S_T} |\mu_j - \hat{\mu}_j|^p \right], \mathbb{E} \left[ \sum_{j \in S_T} |\mu_j - \hat{\mu}_j|^p \right] \right\} = O \left( s \left( \frac{pd}{n\varepsilon^2} \right)^{p/2} \right).$$

The proposition follows directly from the lemma. Indeed, for  $p > 2 \log s$ , by monotonicity of  $\ell_p$  norms we have  $\|\mu - \hat{\mu}\|_p \leq \|\mu - \hat{\mu}\|_{p'}$  for all  $p' \leq p$ , and thus choosing  $p' := 2 \log s$  is sufficient to obtain the stated bound.  $\square$

635 *Proof of Lemma 4.* We prove the bound on each term individually. The first term captures the  
 636 performance of our estimator within coordinates in  $S_T$  and the second term states that we do not  
 637 “prune” too many coordinates with high non-zero means.

638 **Bounding the first term.** For  $j \notin S_T$ , we output  $\hat{\mu}_j = 0$ . Therefore,

$$\mathbb{E} \left[ \sum_{j \notin S_T} |\mu_j - \hat{\mu}_j|^p \right] = \sum_j \mathbb{E}[|\mu_j - \hat{\mu}_j|^p \cdot \mathbf{1}\{j \notin S_T\}] = \sum_j |\mu_j|^p \cdot \Pr[j \notin S_T].$$

639 Since  $\mu$  is  $s$ -sparse, it will suffice to show that for all  $j$  with  $|\mu_j| > 0$ ,

$$|\mu_j|^p \cdot \Pr[j \notin S_T] = O \left( \left( \frac{pd}{n\varepsilon^2} \right)^{p/2} \right). \quad (21)$$

640 Let

$$H := 20 \sqrt{\frac{d}{n(2\alpha - 1)^2}}.$$

641 Note that for  $\varepsilon \in (0, 1]$ , we have  $2\alpha - 1 \geq \frac{\varepsilon - 1}{\varepsilon + 1} \varepsilon$ . Therefore, if  $|\mu_j| \leq H$ , then Eq. (21) holds since  
 642  $\Pr[j \notin S] \leq 1$ . We hereafter assume  $|\mu_j| > H$ , and let  $\mu_j = \beta_j H$  with  $\beta_j > 1$ . Let  $E_{t,j}$  be the  
 643 event that coordinate  $j$  is removed in round  $t$  given that  $j \in S_{t-1}$ . Then we have

$$\Pr[j \notin S_T] \leq \sum_{t=1}^T \Pr[E_{t,j}].$$

644 We proceed to bound each  $\Pr[E_{t,j}]$  separately. Note that for  $i \in G_{t,j}$ ,  $Y_i \in \{-1, +1\}$  and by Eq. (20)

$$\mathbb{E}[Y_i] = (2\alpha - 1) \cdot \mu_j = (2\alpha - 1)\beta_j H. \quad (22)$$

645 Let  $a_{t,j}$  be the number of coordinates  $j'$  with  $\mu_{j'} = 0$  and  $|M_{t,j'}| \geq \frac{1}{2}N_t(2\alpha - 1)\beta_j H$ . Since we  
 646 select the  $|S_{t-1}|/3$  coordinates with the largest magnitude of the sum, for  $j \notin S_t$  to happen at least  
 647 one of the following must occur: (i)  $a_{t,j} > \frac{1}{3}|S_{t-1}| - s$ , or (ii)  $M_{t,j} < \frac{1}{2}N_t(2\alpha - 1)\beta_j H$ .

648 By Hoeffding’s inequality, we have

$$\Pr \left[ M_{t,j} < \frac{1}{2}N_t(2\alpha - 1)\beta_j H \right] \leq \exp \left( -\frac{1}{8}N_t((2\alpha - 1)\beta_j H)^2 \right) < \exp(-5 \cdot 2^t \beta_j^2).$$

649 Let  $p_{t,j} := e^{-5 \cdot 2^t \beta_j^2}$ . Similarly, for any  $j'$  such that  $\mu_{j'} = 0$ ,

$$\Pr \left[ |M_{t,j'}| \geq \frac{1}{2}N_t(2\alpha - 1)\beta_j H \right] \leq 2p_{t,j}.$$

650 Since all coordinates are independent,  $a_{t,j}$  is binomially distributed with mean at most  $2p_{t,j}|S_{t-1}|$ .

651 By Markov’s inequality, we get

$$\Pr \left[ a_{t,j} > \frac{1}{3}|S_{t-1}| - s \right] \leq \frac{\mathbb{E}[a_{t,j}]}{|S_{t-1}|/3 - s} \leq p_{t,j},$$

652 recalling that  $|S_{t-1}| = d3^{t-1} \geq 9s$ . By a union bound and summing over  $t \in [T]$ , we get

$$\Pr[j \notin S_T] \leq \sum_{t=1}^T \Pr[E_{t,j}] \leq \sum_{t=1}^T 3p_{t,j} = 3 \sum_{t=1}^T \exp(-2^t \cdot 5\beta_j^2) \leq 6 \exp(-5\beta_j^2).$$

653 Not that for  $x > 0$ ,  $x^p e^{-x^2} \leq \left( \frac{p}{2e} \right)^{p/2}$ . Hence

$$|\mu_j|^p \cdot \Pr[j \notin S_T] \leq 6H^p \beta_j^p e^{-5\beta_j^2} \leq \left( C \frac{pd}{n\varepsilon^2} \right)^{p/2},$$

654 for some absolute constant  $C > 0$ , completing the proof.

655 **Bounding the second term.** Note that  $S_T$  is a random variable itself. We show that the bound holds  
 656 for any realization of  $S_T$ . We need the following result which follows from standard moment bounds  
 657 on binomial distributions.

658 **Fact 1.** Let  $p \geq 1$ ,  $m \in \mathbb{N}$ ,  $0 \leq q \leq 1$ , and  $N \sim \text{Bin}(m, q)$ . Then,  $\mathbb{E}[|N - mq|^p] \leq 2^{-p/2} m^{p/2} p^{p/2}$   
659 .

660 Applying this with  $m = N_T \geq \frac{n}{6d}$ , the transformation from Bernoulli to  $\{-1, +1\}$ , and the scaling  
661 by  $2\alpha - 1$ , yields for  $j \in S_T$ , and using Eq. (22)

$$\mathbb{E}[|\mu_j - \hat{\mu}_j|^p] \leq \left( \frac{p}{(n/6d)(2\alpha - 1)^2} \right)^{p/2}.$$

662 Upon summing over  $j \in S_T$ , we obtain

$$\mathbb{E} \left[ \sum_{j \in S_T} |\mu_j - \hat{\mu}_j|^p \right] \leq 3s \cdot \left( \frac{6(e+1)^2 d}{(e-1)^2 n \varepsilon^2} \right)^{p/2} \leq 3 \cdot 6^p \cdot s \left( \frac{pd}{n \varepsilon^2} \right)^{p/2}. \quad \square$$

### 663 C.1.2 Communication constraints

664 In Algorithm 2 we propose a protocol to estimate the mean of product Bernoulli distributions under  
665  $\ell$ -bit communication constraints. As mentioned in the previous subsection, the  $\varepsilon$ -LDP algorithm with  
666  $\varepsilon > 1$  will follow from a simple modification of the communication-constrained one; we discuss  
667 how to privatize the latter to obtain the former at the end of the section. As in the LDP case when  
668  $\varepsilon \in (0, 1]$ , in 2-10 the algorithm iteratively prunes an initial set  $S_0 = [d]$  to obtain a set  $S_T$  of size  
669  $\max\{3s, \ell\}$ , which denotes the set of potential non-zero coordinates. We then estimate the mean  
670 of coordinates in  $S_T$ . If  $\ell > 3s$ , then we can directly send the values of all coordinates in  $S_T$  and  
671 use it for estimation; otherwise, when  $3s > \ell$ , we again partition  $S_T$  into sets of size  $\ell$  and each  
672 player sends the bits of its sample in this set. This is done in Lines 11-18. We state the performance  
673 of Algorithm 2 below.

674 **Proposition 2.** Fix  $p \in [1, \infty]$ . For  $n \geq 1$  and  $\ell \leq d$ , we have Algorithm 2 is an  $(n, \gamma)$ -estimator  
675 using  $\mathcal{W}_\ell$  under  $\ell_p$  loss for  $\mathcal{B}_{d,s}$  with  $\gamma = O\left(\sqrt{\frac{pds^{2/p}}{n\ell}} + \frac{(p+\log(2\ell/s))s^{2/p}}{n}\right)$  for  $p \leq 2\log s$  and  
676  $\gamma = O\left(\sqrt{\frac{d\log s}{n\ell}} + \frac{\log \ell}{n}\right)$  for  $p > 2\log s$ .

677 When  $\ell \leq 3s$ , the bound we get is  $\gamma \lesssim \sqrt{\frac{pds^{2/p}}{n\ell}}$ . The analysis is almost identical to the case under  
678 LDP constraints, since in both cases, the information we get about coordinate  $j$  are samples from a  
679 Rademacher distribution with mean  $(2\alpha - 1)\mu_j$ . There are only two differences. (i)  $\alpha = 1$  instead of  
680  $\Theta(\varepsilon^2)$ . (ii) There is a factor of  $\ell$  more players in the corresponding groups. Combining both factors,  
681 we can obtain the desired bound by replacing  $\varepsilon^2$  by  $\ell$ . We omit the detailed proof in this case.

682 When  $\ell > 3s$ , after  $T \asymp \log(d/\ell)$  rounds, we can find a subset  $S_T$  of size  $\ell$  which contains most of  
683 the coordinates with large biases. The protocol then asks new players to send all coordinates within  
684  $S_T$  using  $\ell$  bits. In this case, it would be enough to prove Lemma 5 since for the coordinates outside  
685  $S_T$ , we can show the error is small following exactly the same steps as the proof for bounding the first  
686 term in Lemma 4 as we explained in the case when  $\ell \leq 3s$ .

687 **Lemma 5.** Let  $S_T$  be the subset obtained from the first stage of Algorithm 2, we have

$$\mathbb{E} \left[ \sum_{j \in S_T} |\mu_j - \hat{\mu}_j|^p \right] = O \left( s \left( \frac{p + \log \frac{2\ell}{s}}{n} \right)^{p/2} \right).$$

688 *Proof.* Similar to Lemma 4, we will prove that the statement is true for any realization of  $S_T$ , which  
689 is a stronger statement than the claim.

$$\begin{aligned} \mathbb{E} \left[ \sum_{j \in S_T} |\mu_j - \hat{\mu}_j|^p \right] &= \mathbb{E} \left[ \sum_{j \in S_T} |\mu_j - \hat{\mu}_j|^p \mathbb{1}\{j \in S_{T+1}\} \right] + \mathbb{E} \left[ \sum_{j \in S_T} |\mu_j|^p \mathbb{1}\{j \notin S_{T+1}\} \right] \\ &\leq \mathbb{E} \left[ \sum_{j \in S_{T+1}} |\mu_j - \hat{\mu}_j|^p \right] + \sum_{j \in S_T} |\mu_j|^p \Pr[j \notin S_{T+1}]. \end{aligned}$$

---

**Algorithm 2**  $\ell$ -bit protocol for estimating product of Bernoulli family

---

**Require:**  $n$  players, dimension  $d$ , sparsity parameter  $s$ , communication bound  $\ell$ .

- 1: Set  $T := \log_3(d/\max\{3s, \ell\})$ ,  $S_0 := [d]$ ,  $N_0 := \frac{n\ell}{18d}$ .
- 2: **for**  $t = 1, 2, \dots, T$  **do**
- 3:   Set  $P := \frac{d}{3^{t-1}\ell}$ , and partition  $S_{t-1}$  into  $P$  subsets  $S_{t-1,1}, \dots, S_{t-1,P}$ , each of size  $\ell$ .
- 4:   **for**  $j = 1, 2, \dots, P$  **do**
- 5:     Get a group of new players  $G_{t,j}$  of size  $N_t = N_0 \cdot 2^t$ .
- 6:     Player  $i \in G_{t,j}$ , upon observing  $X_i \in \{-1, +1\}^d$  sends the message  $Y_i = \{(X_i)_x\}_{x \in S_{t-1,j}}$ .
- 7:     For  $x \in S_{t-1,j}$ , let  $M_{t,x} := \sum_{i \in G_{t,j}} (X_i)_x$ .
- 8:   Set  $S_t \subseteq S_{t-1}$  to be the set of indices with the largest  $|M_{t,x}|$  and  $|S_t| = |S_{t-1}|/3$ .
- 9: **if**  $\ell \leq 3s$  **then**
- 10:   Partition  $S_T$  into  $3s/\ell$  subsets of size  $\ell$  each,  $S_{T,j}, j \in [3s/\ell]$ .
- 11:   **for**  $j = 1, \dots, 3s/\ell$  **do**
- 12:     Get a new group  $G_{T+1,j}$  of players of size  $n\ell/(6s)$ .
- 13:     Player  $i \in G_{T+1,j}$ , sends the message  $Y_i = \{(X_i)_x\}_{x \in S_{T,j}}$ .
- 14:     For  $x \in S_{T,j}$ , let  $M_{T+1,x} = \sum_{i \in G_{T+1,j}} (X_i)_x$ . Set

$$\hat{\mu}_x := \frac{6s}{n\ell} M_{T+1,x},$$

- 15:   For  $x \notin S_T$ , set  $\hat{\mu}_x = 0$ .
- 16: **if**  $\ell > 3s$  **then**,
- 17:   Get  $n/2$  new players  $G_{T+1}$  and for  $i \in G_{T+1}$ , player  $i$  sends  $Y_i = \{(X_i)_x\}_{x \in S_T}$ . This can be done since  $|S_T| = \ell$  if  $\ell > 3s$ .
- 18:   For  $x \in S_T$ , let  $M_{T+1,x} = \sum_{i \in G_{T+1,j}} (X_i)_x$ . Set  $S_{T+1} \subseteq S_T$  to be the set of indices with the largest  $|M_{T+1,x}|$  and  $|S_{T+1}| = 3s$ . For all  $x \in S_{T+1}$ , set

$$\hat{\mu}_x := \frac{2}{n} M_{T+1,x},$$

and for all  $x \notin S_{T+1}$ ,  $\hat{\mu}_x = 0$ .

- 19: **return**  $\hat{\mu}$ .
- 

690 Fix  $S_{T+1}$ . For each  $j \in S_{T+1}$ ,  $M_{T+1,j}$  is binomially distributed with mean  $\mu_j$  and  $n/2$  trials. By  
691 similar computations as Lemma 4, we have

$$\mathbb{E} \left[ \sum_{j \in S_{T+1}} |\mu_j - \hat{\mu}_j|^p \right] = O \left( s \left( \frac{p}{n} \right)^{p/2} \right). \quad (23)$$

692 Next we show for all  $j \in S_T$  such that  $\mu_j \neq 0$ ,

$$|\mu_j|^p \Pr[j \notin S_{T+1}] \leq 2 \left( \frac{p \vee 64 \ln \frac{2\ell}{s}}{n} \right)^{p/2}. \quad (24)$$

693 If  $|\mu_j| \leq H' := 8\sqrt{\frac{\ln \frac{2\ell}{s}}{n}}$ , Eq. (24) always holds since  $\Pr[j \notin S] \leq 1$ . Hence we hereafter assume  
694 that  $|\mu_j| > H'$ , and write  $\mu_j = \beta_j H'$  for some  $\beta_j > 1$ .

695 Let  $a_{T+1,j}$  be the number of coordinates  $j'$  with  $\mu_{j'} = 0$  and  $|M_{T+1,j'}| \geq \frac{n}{2} \cdot \frac{\beta_j H'}{2}$ . Then since  
696  $S_{T+1}$  contains the top  $3s$  coordinates with the largest magnitude of the sum, we have  $j \notin S_{T+1}$   
697 happens only if at least one of the following occurs (i)  $a_{T+1,j} > 2s$ , or (ii)  $M_{T+1,j} < \frac{n}{2} \cdot \frac{\beta_j H'}{2}$ .

698 By Hoeffding's inequality, we have

$$\Pr \left[ M_{T+1,j} < \frac{n}{2} \cdot \frac{\beta_j H'}{2} \right] \leq \exp \left( -\frac{1}{2} \cdot \frac{n}{2} \cdot \left( \frac{\beta_j H'}{2} \right)^2 \right) = \left( \frac{2\ell}{s} \right)^{-4\beta_j^2} := p_{T+1,j}.$$

699 Similarly, for any  $j'$  such that  $\mu_{j'} = 0$ ,

$$\Pr\left[|M_{T+1,j'}| \geq \frac{n}{2} \cdot \frac{\beta_j H'}{2}\right] \leq 2p_{T+1,j}.$$

700 Since all coordinates are independent,  $a_{T+1,j}$  is binomially distributed with mean at most  $2p_{T+1,j}\ell$ ,  
 701 and therefore, by Markov's inequality,

$$\Pr[a_{T+1,j} > 2s] \leq \frac{2p_{T+1,j}\ell}{2s} \leq \left(\frac{2\ell}{s}\right)^{1-4\beta_j^2} \leq \left(\frac{2\ell}{s}\right)^{-3\beta_j^2}$$

702 the last step since  $\beta_j > 1$ . By a union bound, we have

$$\Pr[j \notin S_T] \leq \Pr[a_{T+1,j} > 2s] + \Pr\left[M_{T+1,j} < \frac{1}{4} \frac{n}{2} \cdot \frac{\beta_j H'}{2}\right] \leq 2\left(\frac{2\ell}{s}\right)^{-3\beta_j^2}.$$

703 Using the inequality  $x^p a^{-x^2} \leq \left(\frac{p}{2e \ln a}\right)^{p/2}$  which holds for all  $x > 0$ , we get overall

$$|\mu_j|^p \cdot \Pr[j \notin S_T] \leq 2H'^p \beta_j^p \left(\frac{2\ell}{s}\right)^{-4\beta_j^2} \leq 2\left(\frac{p}{en}\right)^{p/2},$$

704 establishing Eq. (24). Combining Eq. (23) and Eq. (24) concludes the proof Lemma 5 since there are  
 705 at most  $s$  unbiased coordinates.  $\square$

706 **Algorithm under LDP with  $\varepsilon > 1$**  To get a  $\varepsilon$ -LDP algorithm in the regime  $\varepsilon > 1$  (low-privacy  
 707 regime), we perform the following changes to obtain a private algorithm from Algorithm 2:

- 708 • Each user independently flips each coordinate of their local sample to get  $Z_i$  where, for all  
 709  $x \in [d]$ ,  $(Z_i)_x = (X_i)_x$  with probability  $\frac{e}{e+1}$  and  $(Z_i)_x = 1 - (X_i)_x$  with probability  $\frac{1}{e+1}$   
 710 (note that this corresponds to applying Randomized Response independently to each bit  
 711 with privacy parameter 1).
- 712 • Users then follow Algorithm 2 with the setting  $\ell = \lfloor \varepsilon \rfloor$  and local data  $\{Z_i\}_{i \in [n]}$ , and obtain  
 713 estimate  $\hat{\mu}$ .
- 714 • The final estimate is then  $\frac{e+1}{e-1} \hat{\mu}$ .

715 The privacy guarantee of the algorithm comes from the fact that Algorithm 2 sends at most  $\ell = \lfloor \varepsilon \rfloor$   
 716 coordinates of each  $Z_i$ , and for any  $S$  with  $|S| \leq \lfloor \varepsilon \rfloor$

$$\frac{\Pr[\{(Z_i)_x\}_{x \in S} \mid X_i]}{\Pr[\{(Z_i)_x\}_{x \in S} \mid X'_i]} = \prod_{x \in S} \frac{\Pr[(Z_i)_x \mid (X_i)_x]}{\Pr[(Z_i)_x \mid (X'_i)_x]} \leq e^{\lfloor \varepsilon \rfloor}.$$

717 The utility guarantee follows from observing that  $\mu_Z = \frac{e-1}{e+1} \mu$  and hence any  $\ell_p$  error guarantee will  
 718 be preserved up to a constant.

## 719 C.2 Gaussian Mean Estimation

720 Recall that  $\mathcal{G}_{d,s}$  denotes the family of  $d$ -dimensional spherical Gaussian distributions with  $s$ -sparse  
 721 mean in  $[-1, 1]^d$ , i.e.,

$$\mathcal{G}_{d,s} = \{ \mathcal{G}(\mu, \mathbb{I}) : \|\mu\|_\infty \leq 1, \|\mu\|_0 \leq s \}. \quad (25)$$

722 We will prove the following results for LDP and communication constraints, respectively.

723 **Proposition 3.** Fix  $p \in [1, \infty]$ . For  $n \geq 1$  and  $\varepsilon \in (0, 1]$ , there exists an  $(n, \gamma)$ -estimator using  
 724  $\mathcal{W}_\varepsilon$  under  $\ell_p$  loss for  $\mathcal{G}_{d,s}$  with  $\gamma = O\left(\sqrt{\frac{pds^{2/p}}{n\varepsilon^2}}\right)$  for  $p \leq 2 \log s$  and  $\gamma = O\left(\sqrt{\frac{d \log s}{n\varepsilon^2}}\right)$  for  
 725  $p > 2 \log s$ .

726 **Proposition 4.** Fix  $p \in [1, \infty]$ . For  $n \geq 1$  and  $\ell \leq d$ , there exists an  $(n, \gamma)$ -estimator using  
 727  $\mathcal{W}_\ell$  under  $\ell_p$  loss for  $\mathcal{G}_{d,s}$  with  $\gamma = O\left(\sqrt{\frac{pds^{2/p}}{n\ell}} + \frac{(p+\log(2\ell/s))s^{2/p}}{n}\right)$  for  $p \leq 2 \log s$  and  $\gamma =$   
 728  $O\left(\sqrt{\frac{d \log s}{n\ell}} + \frac{\log \ell}{n}\right)$  for  $p > 2 \log s$ .

We reduce the problem of Gaussian mean estimation to that of Bernoulli mean estimation and then invoke Propositions 1 and 2 from the previous section. At the heart of the reduction is a simple idea that was used in, e.g., [10, 2, 11]: the sign of a Gaussian random variable already preserves sufficient information about the mean. Details follow.

Let  $\mathbf{p} \in \mathcal{G}_{d,s}$  with mean  $\mu(\mathbf{p}) = (\mu(\mathbf{p})_1, \dots, \mu(\mathbf{p})_d)$ . For  $X \sim \mathbf{p}$ , let  $Y = (\text{sign}(X_i))_{i \in [d]} \in \{-1, +1\}^d$  be a random variable indicating the signs of the  $d$  coordinates of  $X$ . By the independence of the coordinates of  $X$ , note that  $Y$  is distributed as a product Bernoulli distribution (in  $\mathcal{B}_d$ ) with mean vector  $\nu(\mathbf{p})$  given by

$$\nu(\mathbf{p})_i = 2 \Pr_{X \sim \mathbf{p}} [X_i > 0] - 1 = \text{Erf}\left(\frac{\mu(\mathbf{p})_i}{\sqrt{2}}\right), \quad i \in [d], \quad (26)$$

and, since  $|\mu(\mathbf{p})_i| \leq 1$ , we have  $\nu(\mathbf{p}) \in [-\eta, \eta]^d$ , where  $\eta := \text{Erf}(1/\sqrt{2}) \approx 0.623$ . Moreover, it is immediate to see that each player, given a sample from  $\mathbf{p}$ , can convert it to a sample from the corresponding product Bernoulli distribution. We now show that a good estimate for  $\nu(\mathbf{p})$  yields a good estimate for  $\mu(\mathbf{p})$ .

**Lemma 6.** Fix any  $p \in [1, \infty)$ , and  $\mathbf{p} \in \mathcal{G}_d$ . For  $\hat{\nu} \in [-\eta, \eta]^d$ , define  $\hat{\mu} \in [-1, 1]^d$  by  $\hat{\mu}_i := \sqrt{2} \text{Erf}^{-1}(\hat{\nu}_i)$ , for all  $i \in [d]$ . Then

$$\|\mu(\mathbf{p}) - \hat{\mu}\|_p \leq \sqrt{\frac{e\pi}{2}} \cdot \|\nu(\mathbf{p}) - \hat{\nu}\|_p.$$

*Proof.* By computing the maximum of its derivative,<sup>7</sup> we observe that the function  $\text{Erf}^{-1}$  is  $\frac{\sqrt{e\pi}}{2}$ -Lipschitz on  $[-\eta, \eta]$ . By the definition of  $\hat{\mu}$  and recalling Eq. (26), we then have

$$\|\mu(\mathbf{p}) - \hat{\mu}\|_p^p = \sum_{i=1}^d |\mu(\mathbf{p})_i - \hat{\mu}_i|^p = 2^{p/2} \cdot \sum_{i=1}^d |\text{Erf}^{-1}(\nu_i) - \text{Erf}^{-1}(\hat{\nu}_i)|^p \leq \left(\frac{e\pi}{2}\right)^{p/2} \cdot \sum_{i=1}^d |\nu_i - \hat{\nu}_i|^p,$$

where we used the fact that  $\nu, \hat{\nu} \in [-\eta, \eta]^d$ .  $\square$

As previously discussed, combining Lemma 6 with Propositions 1 and 2 (with  $\gamma' := \sqrt{\frac{2}{e\pi}}\gamma$ ) immediately implies Propositions 3 and 4 for  $p \in [1, \infty]$ .

**Remark 3.** Note that for the Gaussian family, we also consider the linear measurement constraint. Under linear measurement constraints, we can use the linear measurement matrix to obtain  $r$  out of  $d$  coordinates and perform the above reduction to product of Bernoulli family. The obtained bound will be same as that under communication constraints.

## D Relation to other lower bound methods

We now discuss how our techniques compare with other existing approaches for proving lower bounds under information constraints. Specifically, we clarify the relationship between our technique and the approach using strong data processing inequalities (SDPI) as well as that based on van Trees inequality (a generalization of the Cramér–Rao bound).

### D.1 Strong data processing inequalities

We note first that the bound in Eq. (5) can be interpreted as a strong data processing inequality. Indeed, the average discrepancy on the left-side of inequality can be viewed as the average information  $Y^n$  reveals about each bit of  $Z$ . Here the information is measured in terms of total variation distance. The information quantity on the right-side denotes the information between the input  $X^n$  and the output  $Y^n$  of the channels. Since the Markov relation  $Z^n \text{---} X^n \text{---} Y^n$  holds, the inequality is thus a strong data processing inequality with strong data processing constant roughly  $\sigma^2/k$ . Such

<sup>7</sup>Specifically, we have that  $\max_{x \in [-\eta, \eta]} \text{Erf}^{-1}(x) = 1/\sqrt{2}$  by definition of  $\eta$  and monotonicity of  $\text{Erf}$ . Recalling then that, for all  $x \in [-\eta, \eta]$ ,  $(\text{Erf}^{-1})'(x) = \frac{1}{\text{Erf}'(\text{Erf}^{-1}(x))} = \frac{\sqrt{\pi}}{2} e^{(\text{Erf}^{-1}(x))^2} \leq \frac{\sqrt{\pi}}{2} e^{\frac{1}{2}}$ , we get the Lipschitzness claim.

strong data processing inequalities were used to derive lower bounds for statistical estimation under communication constraints in [34, 10, 31]. We note that our approach recovers these bounds, and further applies to arbitrary constraints captured by  $\mathcal{W}$ .

## D.2 Connection to the van Trees inequality

The average information bound in (3), in fact, allows us to recover bounds similar to the van Trees inequality-based bounds developed in [7] and [8].

For  $\Theta \subset \mathbb{R}^k$  and a parametric family<sup>8</sup>  $\mathcal{P}_\Theta = \{\mathbf{p}_\theta, \theta \in \Theta\}$ , recall that the Fisher information matrix  $J(\theta)$  is a  $k \times k$  matrix given by, under some mild regularity conditions,

$$J(\theta)_{i,j} = -\mathbb{E}_{\mathbf{p}_\theta} \left[ \frac{\partial^2 \log \mathbf{p}_\theta}{\partial \theta_i \partial \theta_j}(X) \right], \quad i, j \in [k].$$

In particular, the diagonal entries equal

$$J(\theta)_{i,i} = \mathbb{E}_{\mathbf{p}_\theta} \left[ \left( \frac{1}{\mathbf{p}_\theta(X)} \cdot \frac{\partial \mathbf{p}_\theta}{\partial \theta_i}(X) \right)^2 \right], \quad i \in [k].$$

For our application, given a channel  $W \in \mathcal{W}$ , we consider the family  $\mathcal{P}_\Theta^W := \{\mathbf{p}_\theta^W, \theta \in \Theta\}$  of distributions induced on the output of the channel  $W$  when the input distributions are from  $\mathcal{P}_\Theta$ . We denote the Fisher information matrix for this family by  $J^W(\theta)$ , which we compute next under a refined version of our Assumption 1 described below.

Let  $\theta$  be a point in the interior of  $\Theta$  and  $\mathbf{p}_\theta$  be differentiable at  $\theta$ . We set  $\theta_z := \theta + \frac{\gamma}{2}z$ ,  $z \in \{-1, +1\}^k$ , and make the following assumption about the structure of the parametric family of distribution: For all  $z \in \{-1, +1\}^k$  and  $i \in [k]$ ,

$$\frac{d\mathbf{p}_{z \oplus i}}{d\mathbf{p}_z} = 1 + \gamma \xi_{z,i}^\gamma + \gamma^2 \psi_{z,i}^\gamma, \quad (27)$$

where  $\mathbb{E}_{\mathbf{p}_z} [\xi_{z,i}^\gamma(X)^2]$  and  $\mathbb{E}_{\mathbf{p}_z} [\psi_{z,i}^\gamma(X)^2]$  are assumed to be uniformly bounded for  $\gamma$  sufficiently small; for concreteness, we assume  $\mathbb{E}_{\mathbf{p}_z} [\psi_{z,i}^\gamma(X)^2] \leq c^2$  for a constant  $c$ , for all  $\gamma$  sufficiently small. Let  $\xi_{z,i}(x) := \lim_{\gamma \rightarrow 0} \xi_{z,i}^\gamma(x)$ , for all  $x$ .

In applications, we expect the dependence of  $\xi_{z,i}^\gamma$  on  $\gamma$  to be “mild,” and, in essence, the assumption above provides a linear expansion of the term  $\alpha_{z,i} \phi_{z,i}$  from Assumption 1 as a function of the perturbation parameter  $\gamma$ . Assuming that the densities are differentiable as a function of  $\theta$ , for the distribution  $\mathbf{p}_\theta^W$  of the output of a channel  $W$  with input  $X \sim \mathbf{p}_\theta$ , we get

$$\begin{aligned} \frac{\partial \mathbf{p}_\theta^W(y)}{\partial \theta_i} &= z_i \lim_{\gamma \rightarrow 0} \frac{\mathbf{p}_{\theta_z}^W(y) - \mathbf{p}_{\theta_{z \oplus i}}^W(y)}{\gamma} \\ &= z_i \lim_{\gamma \rightarrow 0} \mathbb{E}_{\mathbf{p}_z} [(\xi_{z,i}^\gamma(X) + \gamma \psi_{z,i}^\gamma(X)) W(y | X)] \\ &= z_i \mathbb{E}_{\mathbf{p}_\theta} [\xi_{z,i} W(y | X)], \end{aligned}$$

where we used Eq. (27), the fact that  $\lim_{\gamma \rightarrow 0} \theta_z = \theta$ , the fact that  $\mathbb{E}_{\mathbf{p}_z} [\psi_{z,i}^\gamma(X) W(y | X)] \leq c \sqrt{\mathbb{E}_{\mathbf{p}_z} [W(y | X)^2]} \leq c$ , and the dominated convergence theorem. Thus, we get

$$\text{Tr}(J^W(\theta)) = \sum_{i=1}^k \int_{\mathcal{Y}} \frac{\mathbb{E}_{\mathbf{p}_\theta} [\xi_{z,i}(X) W(y | X)]^2}{\mathbb{E}_{\mathbf{p}_\theta} [W(y | X)]} d\mu. \quad (28)$$

Our information contraction bound will be seen later (Section 5) to yield lower bounds for expected estimation error. For concreteness, we give a preview of a version here. We assume for simplicity that  $\mathcal{W}_t = \mathcal{W}$  for all  $t$  and consider the  $\ell_2$  loss function for the dense ( $\tau = 1/2$ ) case. By following

<sup>8</sup>We assume that each distribution  $\mathbf{p}_\theta$  has a density with respect to a common measure  $\nu$ , and, with a slight abuse of notation, denote the density of  $\mathbf{p}_\theta$  also by  $\mathbf{p}_\theta(X)$ .

the proof of Lemma 1 below, given an  $(n, \gamma)$ -estimator  $\hat{\theta} = \hat{\theta}(Y^n, U)$  of  $\mathcal{P}_\Theta$  using  $\mathcal{W}^n$  under  $\ell_2$  loss, we can find an estimator  $\hat{Z} = \hat{Z}(Y^n, U)$  such that

$$\gamma^2 \sum_{i=1}^k \Pr[\hat{Z}_i \neq Z_i] = \mathbb{E}[\|\theta_Z - \theta_{\hat{Z}}\|_2^2] \leq 4\gamma^2,$$

whereby

$$\frac{1}{k} \sum_{i=1}^k d_{\text{TV}}(\mathbf{p}_{+i}^{Y^n}, \mathbf{p}_{-i}^{Y^n}) \geq 1 - \frac{2}{k} \sum_{i=1}^k \Pr[\hat{Z}_i \neq Z_i] \geq 1 - \frac{8\gamma^2}{k\gamma^2}.$$

Upon setting  $\gamma := 4\gamma/\sqrt{k}$ , we get that the left-side of Eq. (3) is bounded below by  $1/4$ . For the same  $\gamma$  and under Eq. (27), the right-side evaluates to

$$\begin{aligned} & \frac{4\gamma^2 n}{k} \max_{z \in \mathcal{Z}} \max_{W \in \mathcal{W}} \sum_{i=1}^k \int_{\mathcal{Y}} \frac{\mathbb{E}_{\mathbf{p}_z}[(\xi_{z,i}^\gamma(X) + \gamma\psi_{z,i}^\gamma(X))W(y|X)]^2}{\mathbb{E}_{\mathbf{p}_z}[W(y|X)]} d\mu \\ & \leq \frac{8\gamma^2 n}{k} \max_{z \in \mathcal{Z}} \max_{W \in \mathcal{W}} \sum_{i=1}^k \int_{\mathcal{Y}} \frac{\mathbb{E}_{\mathbf{p}_z}[\xi_{z,i}^\gamma(X)W(y|X)]^2 + \gamma^2 \mathbb{E}_{\mathbf{p}_z}[\psi_{z,i}^\gamma(X)W(y|X)]^2}{\mathbb{E}_{\mathbf{p}_z}[W(y|X)]} d\mu \\ & \leq \frac{128\gamma^2 n}{k^2} \left( \max_{z \in \mathcal{Z}} \max_{W \in \mathcal{W}} \sum_{i=1}^k \int_{\mathcal{Y}} \frac{\mathbb{E}_{\mathbf{p}_z}[\xi_{z,i}^\gamma(X)W(y|X)]^2}{\mathbb{E}_{\mathbf{p}_z}[W(y|X)]} d\mu + c^2\gamma^2 \right), \end{aligned}$$

where we used  $(a+b)^2 \leq 2(a^2 + b^2)$  and

$$\int_{\mathcal{Y}} \frac{\mathbb{E}_{\mathbf{p}_z}[\psi_{z,i}^\gamma(X)W(y|X)]^2}{\mathbb{E}_{\mathbf{p}_z}[W(y|X)]} d\mu \leq \int_{\mathcal{Y}} \mathbb{E}_{\mathbf{p}_z}[\psi_{z,i}^\gamma(X)^2 W(y|X)] d\mu = \mathbb{E}_{\mathbf{p}_z}[\psi_{z,i}^\gamma(X)^2] \leq c^2.$$

Therefore, Eq. (3) yields

$$\gamma^2 \geq \frac{k^2}{256 \cdot n \left( \max_{z \in \mathcal{Z}} \max_{W \in \mathcal{W}} \sum_{i=1}^k \int_{\mathcal{Y}} \frac{\mathbb{E}_{\mathbf{p}_z}[\xi_{z,i}^\gamma(X)W(y|X)]^2}{\mathbb{E}_{\mathbf{p}_z}[W(y|X)]} d\mu + c^2 \right)}.$$

This bound is, in effect, the same as the van Trees inequality with  $\text{Tr}(J^W(\theta))$  replaced by

$$g(\gamma) := \sum_{i=1}^k \int_{\mathcal{Y}} \frac{\mathbb{E}_{\mathbf{p}_z}[\phi_{z,i}(X)W(y|X)]^2}{\mathbb{E}_{\mathbf{p}_z}[W(y|X)]} d\mu.$$

In fact, in view of Eq. (28),  $\text{Tr}(J^W(\theta)) = \lim_{\gamma \rightarrow 0} g(\gamma) =: g(0)$ . Thus, our general lower bound will recover van Trees inequality-based bounds when Eq. (27) holds and  $g(\gamma) \approx g(0)$ . We note that Eq. (27) holds for all the families considered in this paper (see Eq. (37) for product Bernoulli, Eq. (42) for Gaussian, and Eq. (50) for discrete distributions). We close this discussion by noting that results in Section 3 are obtained by deriving bounds for  $g(\gamma)$  which apply for all  $\gamma$  and, therefore, also for  $g(0) = \text{Tr}(J^W(\theta))$ .

## E Missing proofs in Section 3

### E.1 Proof of Theorem 1

Consider  $Z = (Z_1, \dots, Z_k) \in \{-1, 1\}^k$  where  $Z_1, \dots, Z_k$  are i.i.d. with  $\Pr[Z_i = 1] = \tau$ . For a fixed  $i \in [k]$ , let

$$\begin{aligned} \mathbf{p}_{+i}^{Y^n} &:= \mathbb{E}_Z[\mathbf{p}_Z^{Y^n} | Z_i = +1] = \sum_{z: z_i = +1} \left( \prod_{j \neq i} \tau^{\frac{1+z_j}{2}} (1-\tau)^{\frac{1-z_j}{2}} \right) \mathbf{p}_z^{Y^n} \\ \mathbf{p}_{-i}^{Y^n} &:= \mathbb{E}_Z[\mathbf{p}_Z^{Y^n} | Z_i = -1] = \sum_{z: z_i = -1} \left( \prod_{j \neq i} \tau^{\frac{1+z_j}{2}} (1-\tau)^{\frac{1-z_j}{2}} \right) \mathbf{p}_z^{Y^n}, \end{aligned}$$

the partial mixtures of message distributions conditioned on  $Z_i$ . We will rely on the following lemma, which relates the desired average discrepancy between the  $\mathbf{p}_{+i}^{Y^n}$  and  $\mathbf{p}_{-i}^{Y^n}$ 's to the sum of  $n$  “local” discrepancy measures (in the form of Hellinger distances between local messages). Each local measure can then be easily bounded in terms of the density  $\mathbf{p}_z$  and the channel  $W$  to get the desired bound.

**Lemma 7.** *With the notation of Theorem 1, we have*

$$\left( \frac{1}{k} \sum_{i=1}^k d_{\text{TV}}(\mathbf{p}_{+i}^{Y^n}, \mathbf{p}_{-i}^{Y^n}) \right)^2 \leq \frac{14}{k} \sum_{t=1}^n \max_{z \in \mathcal{Z}} \max_{W \in \mathcal{W}_t} \sum_{i=1}^k d_{\text{H}}(\mathbf{p}_z^W, \mathbf{p}_{z \oplus i}^W)^2, \quad (29)$$

where  $\mathbf{p}_z^W$  denotes the distribution of  $Y \sim W(\cdot | X)$  when  $X \sim \mathbf{p}_z$ .

The proof of the lemma is rather involved and constitutes the core of the argument. We defer it to the end of the section and show first how it implies Theorem 1. For all  $z$  and  $W$ , we have

$$\begin{aligned} d_{\text{H}}(\mathbf{p}_z^W, \mathbf{p}_{z \oplus i}^W)^2 &= \frac{1}{2} \int_{y \in \mathcal{Y}} \left( \sqrt{\mathbb{E}_{\mathbf{p}_z}[W(y | X)]} - \sqrt{\mathbb{E}_{\mathbf{p}_{z \oplus i}}[W(y | X)]} \right)^2 d\mu \\ &= \frac{1}{2} \int_{\mathcal{Y}} \left( \frac{\mathbb{E}_{\mathbf{p}_z}[W(y | X)] - \mathbb{E}_{\mathbf{p}_{z \oplus i}}[W(y | X)]}{\sqrt{\mathbb{E}_{\mathbf{p}_z}[W(y | X)]} + \sqrt{\mathbb{E}_{\mathbf{p}_{z \oplus i}}[W(y | X)]}} \right)^2 d\mu \\ &\leq \frac{1}{2} \int_{\mathcal{Y}} \frac{(\mathbb{E}_{\mathbf{p}_z}[W(y | X)] - \mathbb{E}_{\mathbf{p}_{z \oplus i}}[W(y | X)])^2}{\mathbb{E}_{\mathbf{p}_z}[W(y | X)]} d\mu. \end{aligned} \quad (30)$$

Moreover, under Assumption 1; for any  $W \in \mathcal{W}_t$  and  $y \in \mathcal{Y}$ ,

$$\mathbb{E}_{\mathbf{p}_{z \oplus i}}[W(y | X)] = \mathbb{E}_{\mathbf{p}_z} \left[ \frac{d\mathbf{p}_{z \oplus i}}{d\mathbf{p}_z} \cdot W(y | X) \right] = \mathbb{E}_{\mathbf{p}_z}[(1 + \phi_{z,i}(X)) \cdot W(y | X)].$$

Plugging this back into (30), we get

$$d_{\text{H}}(\mathbf{p}_z^W, \mathbf{p}_{z \oplus i}^W)^2 \leq \frac{1}{2} \int_{\mathcal{Y}} \frac{\mathbb{E}_{\mathbf{p}_z}[\phi_{z,i}(X)W(y | X)]^2}{\mathbb{E}_{\mathbf{p}_z}[W(y | X)]} d\mu.$$

Combining this with Lemma 7 concludes the proof of Theorem 1.

**Proof of Lemma 7.** Our first step is to use the Cauchy–Schwarz inequality, followed by an inequality relating total variation and Hellinger distances:

$$\begin{aligned} \frac{1}{k} \left( \sum_{i=1}^k d_{\text{TV}}(\mathbf{p}_{+i}^{Y^n}, \mathbf{p}_{-i}^{Y^n}) \right)^2 &\leq \sum_{i=1}^k d_{\text{TV}}(\mathbf{p}_{+i}^{Y^n}, \mathbf{p}_{-i}^{Y^n})^2 \\ &\leq 2 \sum_{i=1}^k d_{\text{H}}(\mathbf{p}_{+i}^{Y^n}, \mathbf{p}_{-i}^{Y^n})^2 \\ &\leq 2 \sum_{i=1}^k \mathbb{E}_Z \left[ d_{\text{H}}(\mathbf{p}_Z^{Y^n}, \mathbf{p}_{Z \oplus i}^{Y^n})^2 \mid Z_i = +1 \right] \\ &= 2 \sum_{i=1}^k \mathbb{E}_Z \left[ d_{\text{H}}(\mathbf{p}_Z^{Y^n}, \mathbf{p}_{Z \oplus i}^{Y^n})^2 \right], \end{aligned} \quad (31)$$

where the last inequality uses joint convexity of squared Hellinger distance, and the final identity is due to independence of each coordinate of  $Z$  and symmetry of Hellinger whereby  $\mathbb{E}_Z \left[ d_{\text{H}}(\mathbf{p}_Z^{Y^n}, \mathbf{p}_{Z \oplus i}^{Y^n})^2 \mid Z_i = +1 \right] = \mathbb{E}_Z \left[ d_{\text{H}}(\mathbf{p}_Z^{Y^n}, \mathbf{p}_{Z \oplus i}^{Y^n})^2 \mid Z_i = -1 \right]$ .

In order to bound the resulting terms of the sum, we will rely on the so-called *cut-paste* property of Hellinger distance [6]. Before doing so, we will require an additional piece of notation: for fixed  $z \in \mathcal{Z}$ ,  $i \in [k]$ ,  $t \in [n]$ , let  $\mathbf{p}_{t \leftarrow z \oplus i}^{Y^n}$  denote the message distribution where player  $t$  gets a sample from

830  $\mathbf{p}_{z \oplus i}$  and all other players get samples from  $\mathbf{p}_z$ . That is, for all  $y^n \in \mathcal{Y}^n$ , the density of  $\mathbf{p}_{t \leftarrow z \oplus i}^{Y^n}$  with  
 831 respect to the underlying product measure  $\mu^{\otimes n}$  is given by

$$\frac{d\mathbf{p}_{t \leftarrow z \oplus i}^{Y^n}}{d\mu^{\otimes n}}(y^n) = \mathbb{E}_{X_t \sim \mathbf{p}_{z \oplus i}} \left[ W^{y^{t-1}}(y_t | X_t) \right] \cdot \prod_{j \neq t} \mathbb{E}_{X_j \sim \mathbf{p}_z} \left[ W^{y^{j-1}}(y_j | X_j) \right]. \quad (32)$$

832 The following lemma, due to [22], allows us to relate  $d_H(\mathbf{p}_z^{Y^n}, \mathbf{p}_{z \oplus i}^{Y^n})$ , the distance between mes-  
 833 sage distributions when all players get observations from  $\mathbf{p}_z$ , or all from  $\mathbf{p}_{z \oplus i}$ , to the distances  
 834  $d_H(\mathbf{p}_z^{Y^n}, \mathbf{p}_{t \leftarrow z \oplus i}^{Y^n})$  where only *one* of the  $n$  players gets a sample from  $\mathbf{p}_{z \oplus i}$ .

835 **Lemma 8** ([22, Theorem 7]). *There exists  $c_H > 0$  such that for all  $z \in \mathcal{Z}$  and  $i \in [k]$ ,*

$$d_H(\mathbf{p}_z^{Y^n}, \mathbf{p}_{z \oplus i}^{Y^n})^2 \leq c_H \sum_{t=1}^n d_H(\mathbf{p}_z^{Y^n}, \mathbf{p}_{t \leftarrow z \oplus i}^{Y^n})^2.$$

836 Moreover, one can take  $c_H = 2 \prod_{t=1}^{\infty} \frac{1}{1-2^{-t}} < 7$ .

837 Combining Eq. (31) and Lemma 8, we get

$$\begin{aligned} \frac{1}{k} \left( \sum_{i=1}^k d_{\text{TV}}(\mathbf{p}_{+i}^{Y^n}, \mathbf{p}_{-i}^{Y^n}) \right)^2 &\leq 14 \sum_{i=1}^k \sum_{t=1}^n \mathbb{E}_Z \left[ d_H(\mathbf{p}_Z^{Y^n}, \mathbf{p}_{t \leftarrow Z \oplus i}^{Y^n})^2 \right] \\ &= 14 \sum_{t=1}^n \mathbb{E}_Z \left[ \sum_{i=1}^k d_H(\mathbf{p}_Z^{Y^n}, \mathbf{p}_{t \leftarrow Z \oplus i}^{Y^n})^2 \right]. \end{aligned} \quad (33)$$

838 In view of bounding the RHS of (33) term by term, fix  $j \in [n]$  and  $z \in \mathcal{Z}$ . Recalling the expression  
 839 of  $\mathbf{p}_{t \leftarrow z \oplus i}^{Y^n}$  from (32), unrolling the definition of Hellinger distance, and recalling (32), we have

$$\begin{aligned} &2 \sum_{i=1}^k d_H(\mathbf{p}_z^{Y^n}, \mathbf{p}_{t \leftarrow z \oplus i}^{Y^n})^2 \\ &= \sum_{i=1}^k \int_{\mathcal{Y}^n} \left( \sqrt{\frac{d\mathbf{p}_z^{Y^n}}{d\mu^{\otimes n}}} - \sqrt{\frac{d\mathbf{p}_{t \leftarrow z \oplus i}^{Y^n}}{d\mu^{\otimes n}}} \right)^2 d\mu^{\otimes n} \\ &= \sum_{i=1}^k \int_{\mathcal{Y}^n} \prod_{j \neq t} \mathbb{E}_{\mathbf{p}_z} \left[ W^{y^{j-1}}(y_j | X) \right] \underbrace{\left( \sqrt{\mathbb{E}_{\mathbf{p}_z} [W^{y^{t-1}}(y_t | X)]} - \sqrt{\mathbb{E}_{\mathbf{p}_{z \oplus i}} [W^{y^{t-1}}(y_t | X)]} \right)^2}_{:= f_{i,t}(y^{t-1}, y_t)} d\mu^{\otimes n} \\ &= \sum_{i=1}^k \int_{\mathcal{Y}^{t-1}} \prod_{j < t} \mathbb{E}_{\mathbf{p}_z} \left[ W^{y^{j-1}}(y_j | X) \right] \int_{\mathcal{Y}} f_{i,t}(y^{t-1}, y_t) \int_{\mathcal{Y}^{n-t}} \prod_{j > t} \mathbb{E}_{\mathbf{p}_z} \left[ W^{y^{j-1}}(y_j | X) \right] d\mu^{\otimes(t-1)} d\mu d\mu^{\otimes(n-t)} \\ &= \sum_{i=1}^k \int_{\mathcal{Y}^{t-1}} \prod_{j < t} \mathbb{E}_{\mathbf{p}_z} \left[ W^{y^{j-1}}(y_j | X) \right] \int_{\mathcal{Y}} f_{i,t}(y^{t-1}, y_t) \left( \int_{\mathcal{Y}^{n-t}} \prod_{j > t} \mathbb{E}_{\mathbf{p}_z} \left[ W^{y^{j-1}}(y_j | X) \right] d\mu^{\otimes(n-t)} \right) d\mu^{\otimes(t-1)} d\mu \\ &= \sum_{i=1}^k \int_{\mathcal{Y}^{t-1}} \prod_{j < t} \mathbb{E}_{\mathbf{p}_z} \left[ W^{y^{j-1}}(y_j | X) \right] \int_{\mathcal{Y}} f_{i,t}(y^{t-1}, y_t) d\mu d\mu^{\otimes(t-1)} \\ &= \int_{\mathcal{Y}^{t-1}} \prod_{j < t} \mathbb{E}_{\mathbf{p}_z} \left[ W^{y^{j-1}}(y_j | X) \right] \sum_{i=1}^k \int_{\mathcal{Y}} f_{i,t}(y^{t-1}, y_t) d\mu d\mu^{\otimes(t-1)}, \end{aligned}$$

840 where the second-to-last identity uses the observation that, for any fixed  $y^t \in \mathcal{Y}^t$ ,

$$\int_{\mathcal{Y}^{n-t}} \prod_{j > t} \mathbb{E}_{\mathbf{p}_z} \left[ W^{y^{j-1}}(y_j | X) \right] d\mu^{\otimes(n-t)} = 1,$$

841 which in turn follows upon taking marginal integrals for each coordinate. We then get from the  
 842 pointwise inequality  $\sum_{i=1}^k \int_{\mathcal{Y}^{t-1}} f_{i,t}(y^{t-1}, y_t) d\mu \leq \sup_{y' \in \mathcal{Y}^{t-1}} \sum_{i=1}^k \int_{\mathcal{Y}} f_{i,t}(y', y_t) d\mu$  that

$$\begin{aligned}
 2 \sum_{i=1}^k d_H(\mathbf{p}_z^{Y^n}, \mathbf{p}_{t \leftarrow z \oplus i}^{Y^n})^2 &\leq \int_{\mathcal{Y}^{t-1}} \prod_{j < t} \mathbb{E}_{\mathbf{p}_z} [W^{y^{j-1}}(y_j | X)] \sup_{y' \in \mathcal{Y}^{t-1}} \sum_{i=1}^k \left( \int_{\mathcal{Y}} f_{i,t}(y', y_t) d\mu \right) d\mu^{\otimes(t-1)} \\
 &= \left( \sup_{y' \in \mathcal{Y}^{t-1}} \sum_{i=1}^k \int_{\mathcal{Y}} f_{i,t}(y', y_t) d\mu \right) \int_{\mathcal{Y}^{t-1}} \prod_{j < t} \mathbb{E}_{\mathbf{p}_z} [W^{y^{j-1}}(y_j | X)] d\mu^{\otimes(t-1)} \\
 &= \sup_{y' \in \mathcal{Y}^{t-1}} \sum_{i=1}^k \int_{\mathcal{Y}} \left( \sqrt{\mathbb{E}_{\mathbf{p}_z} [W^{y'}(y | X)]} - \sqrt{\mathbb{E}_{\mathbf{p}_{z \oplus i}} [W^{y'}(y | X)]} \right)^2 d\mu \\
 &\leq \sup_{W \in \mathcal{W}_t} \sum_{i=1}^k \int_{\mathcal{Y}} \left( \sqrt{\mathbb{E}_{\mathbf{p}_z} [W(y | X)]} - \sqrt{\mathbb{E}_{\mathbf{p}_{z \oplus i}} [W(y | X)]} \right)^2 d\mu \\
 &= 2 \cdot \sup_{W \in \mathcal{W}_t} \sum_{i=1}^k d_H(\mathbf{p}_z^W, \mathbf{p}_{z \oplus i}^W)^2. \tag{34}
 \end{aligned}$$

843 the second identity follows upon taking marginal integrals, and by replacing  $f_{i,t}$  by its definition;  
 844 and the second inequality using that  $\{W^{y'} : y' \in \mathcal{Y}^{t-1}\} \subseteq \mathcal{W}_t$ , so that we are taking a supremum  
 845 over a larger set.

846 Plugging this back into (33) and upper bounding the inner expectation by a maximum concludes the  
 847 proof of the lemma.  $\square$

## 848 E.2 Proof of Theorem 2

849 Our starting point is Eq. (3) which holds under Assumption 1. We will bound the right-hand-  
 850 side of Eq. (3) under assumptions of orthogonality and subgaussianity to prove the two bounds  
 851 in Theorem 2.

852 First, under orthogonality (Assumption 2), we apply Bessel's inequality to Eq. (3). For a fixed  
 853  $z \in \mathcal{Z}$ , write  $\psi_{z,i} = \frac{\phi_{z,i}}{\sqrt{\mathbb{E}_{\mathbf{p}_z} [\phi_{z,i}^2]}}$ , and complete  $(1, \psi_{z,1}, \dots, \psi_{z,k})$  to get an orthonormal basis  $\mathcal{B}$  for  
 854  $L^2(\mathcal{X}, \mathbf{p}_z)$ . Fix any  $W \in \mathcal{W}$  and  $y \in \mathcal{Y}$ , and, for brevity, define  $a: \mathcal{X} \rightarrow \mathbb{R}$  as  $a(x) = W(y | x)$ .  
 855 Then, we have

$$\begin{aligned}
 \sum_{i=1}^k \mathbb{E}[\phi_{z,i}(X)a(X)]^2 &\leq \alpha^2 \sum_{i=1}^k \mathbb{E}[\psi_{z,i}(X)a(X)]^2 = \alpha^2 \sum_{i=1}^k \langle a, \psi_{z,i} \rangle^2 = \alpha^2 \sum_{i=1}^k \langle a - \mathbb{E}[a], \psi_{z,i} \rangle^2 \\
 &\leq \alpha^2 \sum_{\psi \in \mathcal{B}} \langle a - \mathbb{E}[a], \psi \rangle^2 = \alpha^2 \text{Var}[a(X)],
 \end{aligned}$$

856 where for the second identity we used the assumption that  $\langle \mathbb{E}[a], \psi_{z,i} \rangle = 0$  for all  $i \in [k]$  (since 1  
 857 and  $\psi_{z,i}$  are orthogonal). This establishes Eq. (4).

858 Turning to Eq. (5), suppose that Assumption 3 holds. Fix  $z \in \mathcal{Z}$ , and consider any  $W \in \mathcal{W}$  and  $y \in \mathcal{Y}$ .  
 859 Upon applying Lemma 4 of the Supplement (See Supplement (Appendix B) for the precise statement  
 860 and proof) to the  $\sigma^2$ -subgaussian random vector  $\phi_z(X)$  and with  $a(x)$  set to  $W(y | x) \in [0, 1]$ , we  
 861 get that

$$\begin{aligned}
 \sum_{i=1}^k \mathbb{E}_{\mathbf{p}_z} [\phi_{z,i}(X)W(y | X)]^2 &= \|\mathbb{E}_{\mathbf{p}_z} [\phi_z(X)W(y | X)]\|_2^2 \\
 &\leq 2\sigma^2 \mathbb{E}_{\mathbf{p}_z} [W(y | X)] \cdot \mathbb{E}_{\mathbf{p}_z} \left[ W(y | X) \log \frac{W(y | X)}{\mathbb{E}_{\mathbf{p}_z} [W(y | X)]} \right]
 \end{aligned}$$

862 Integrating over  $y \in \mathcal{Y}$ , this gives

$$\int_{\mathcal{Y}} \frac{\sum_{i=1}^k \mathbb{E}_{\mathbf{p}_z}[\phi_{z,i}(X)W(y|X)]^2}{\mathbb{E}_{\mathbf{p}_z}[W(y|X)]} d\mu \leq 2\sigma^2 \cdot \int_{\mathcal{Y}} \mathbb{E}_{\mathbf{p}_z} \left[ W(y|X) \log \frac{W(y|X)}{\mathbb{E}_{\mathbf{p}_z}[W(y|X)]} \right] d\mu \\ = 2\sigma^2 I(\mathbf{p}_z; W),$$

863 which yields the claimed bound.

### 864 E.3 Proof of Corollary 1

865 For any  $W \in \mathcal{W}^{\text{priv}, \varepsilon}$ , the  $\varepsilon$ -LDP condition from Eq. (2) can be seen to imply that, for every  $y \in \mathcal{Y}$ ,

$$W(y|x_1) - W(y|x_2) \leq (e^\varepsilon - 1)W(y|x_3), \quad \forall x_1, x_2, x_3 \in \mathcal{X}.$$

866 By taking expectation over  $x_3$  then again either over  $x_1$  or  $x_2$  (all distributed according to  $\mathbf{p}_z$ ), this  
867 yields

$$|W(y|x) - \mathbb{E}_{\mathbf{p}_z}[W(y|X)]| \leq (e^\varepsilon - 1)\mathbb{E}_{\mathbf{p}_z}[W(y|X)], \quad \forall x \in \mathcal{X}.$$

868 Squaring and taking the expectation on both sides, we obtain

$$\text{Var}_{\mathbf{p}_z}[W(y|X)] \leq (e^\varepsilon - 1)^2 \mathbb{E}_{\mathbf{p}_z}[W(y|X)]^2.$$

869 Dividing by  $\mathbb{E}_{\mathbf{p}_z}[W(y|X)]$ , summing over  $y \in \mathcal{Y}$ , and using  $\int_{\mathcal{Y}} \mathbb{E}_{\mathbf{p}_z}[W(y|X)] d\mu = 1$  gives

$$\int_{\mathcal{Y}} \frac{\text{Var}_{\mathbf{p}_z}[W(y|X)]}{\mathbb{E}_{\mathbf{p}_z}[W(y|X)]} d\mu \leq (e^\varepsilon - 1)^2 \int_{\mathcal{Y}} \mathbb{E}_{\mathbf{p}_z}[W(y|X)] d\mu = (e^\varepsilon - 1)^2,$$

870 thus establishing (6). For the bound of  $e^\varepsilon$ , observe that, for all  $y \in \mathcal{Y}$ ,

$$\text{Var}_{\mathbf{p}_z}[W(y|X)] \leq \mathbb{E}_{\mathbf{p}_z}[W(y|X)^2] \leq e^\varepsilon \min_{x \in \mathcal{X}} W(y|x) \mathbb{E}_{\mathbf{p}_z}[W(y|X)].$$

871 Hence

$$\int_{\mathcal{Y}} \frac{\text{Var}_{\mathbf{p}_z}[W(y|X)]}{\mathbb{E}_{\mathbf{p}_z}[W(y|X)]} d\mu \leq e^\varepsilon \int_{\mathcal{Y}} \min_{x \in \mathcal{X}} W(y|x) d\mu \leq e^\varepsilon \cdot \min_{x \in \mathcal{X}} \int_{\mathcal{Y}} W(y|x) d\mu = e^\varepsilon.$$

872 The bound (7) (under Assumption 3) will follow from (5), and the relation between differential privacy  
873 and KL divergence. Indeed, the mutual information  $I(\mathbf{p}_z; W)$  can be rewritten as the expected (over  
874  $X \sim \mathbf{p}_Z$ ) KL divergence between the distribution  $\mathbf{p}^{W,X} := W(\cdot|X)$  over  $\mathcal{Y}$  induced by the  
875 channel  $W$  on input  $X$ , and the distribution  $\mathbf{p}_Z^W := \mathbb{E}_{X' \sim \mathbf{p}_z}[W(\cdot|X')]$  over  $\mathcal{Y}$  induced by the input  
876 distribution  $\mathbf{p}_z$  and the channel  $W$ :

$$I(\mathbf{p}_z; W) = \mathbb{E}_{X \sim \mathbf{p}_z} [\text{D}(\mathbf{p}^{W,X} \| \mathbf{p}_Z^W)] = \mathbb{E}_{X \sim \mathbf{p}_z} \left[ \mathbb{E}_{Y \sim \mathbf{p}^{W,X}} \left[ \ln \frac{W(Y|X)}{\mathbb{E}_{X' \sim \mathbf{p}_z}[W(Y|X')]} \right] \right];$$

877 but the  $\varepsilon$ -LDP condition from Eq. (2) guarantees that the log-likelihood ratio in the inner expectation  
878 is (almost surely) at most  $\varepsilon$ , so that  $I(\mathbf{p}_z; W) \leq \varepsilon$  for every  $z$  and  $W \in \mathcal{W}^{\text{priv}, \varepsilon}$ . This yields (7).

### 879 E.4 Proof of Corollary 2

880 In view of (4), to establish (8), it suffices to show that  $\frac{\text{Var}_{\mathbf{p}_z}[W(y|X)]}{\mathbb{E}_{\mathbf{p}_z}[W(y|X)]} \leq 1$  for every  $y \in \mathcal{Y}$ . Since  
881  $W(y|x) \in (0, 1]$  for all  $x \in \mathcal{X}$  and  $y \in \mathcal{Y}$ , so that

$$\text{Var}_{\mathbf{p}_z}[W(y|X)] \leq \mathbb{E}_{\mathbf{p}_z}[W(y|X)^2] \leq \mathbb{E}_{\mathbf{p}_z}[W(y|X)].$$

882 The second bound (under Assumption 3) will follow from (5). Indeed, recalling that the entropy of  
883 the output of a channel is bounded below by the mutual information between input and the output,  
884 we have  $I(\mathbf{p}_z; W) \leq H(\mathbf{p}_z^W)$ , where  $\mathbf{p}_z^W := \mathbb{E}_{\mathbf{p}_z}[W(\cdot|X)]$  is the distribution over  $\mathcal{Y}$  induced by  
885 the input distribution  $\mathbf{p}_z$  and the channel  $W$ . Using the fact that the entropy of a distribution over  $\mathcal{Y}$   
886 is at most  $\log |\mathcal{Y}|$  in (5) gives (9).

## 887 **F Missing proofs in Section 4**

### 888 **F.1 Proof of Lemma 1**

889 Given an  $(n, \gamma)$ -estimator  $(\Pi, \hat{\theta})$ , define an estimate  $\hat{Z}$  for  $Z$  as

$$\hat{Z} := \operatorname{argmin}_{z \in \mathcal{Z}} \left\| \theta_z - \hat{\theta}(Y^n, U) \right\|_p.$$

890 By the triangle inequality,

$$\left\| \theta_Z - \theta_{\hat{Z}} \right\|_p \leq \left\| \theta_Z - \hat{\theta}(Y^n, U) \right\|_p + \left\| \theta_{\hat{Z}} - \hat{\theta}(Y^n, U) \right\|_p \leq 2 \left\| \hat{\theta}(Y^n, U) - \theta_Z \right\|_p.$$

891 Since  $(\Pi, \hat{\theta})$  is an  $(n, \gamma)$ -estimator under  $\ell_p$  loss for  $\mathcal{P}_\Theta$ ,

$$\begin{aligned} \mathbb{E}_Z \left[ \mathbb{E}_{\mathbf{p}_Z} \left[ \left\| \theta_Z - \theta_{\hat{Z}} \right\|_p^p \right] \right] &\leq 2^p \gamma^p \Pr[\mathbf{p}_Z \in \mathcal{P}_\Theta] + \max_{z \neq z'} \left\| \theta_z - \theta_{z'} \right\|_p^p \Pr[\mathbf{p}_Z \notin \mathcal{P}_\Theta] \\ &\leq 2^p \gamma^p + 4^p \gamma^p \frac{1}{\tau} \cdot \frac{\tau}{4} \end{aligned} \quad (35)$$

$$\leq \frac{3}{4} 4^p \gamma^p, \quad (36)$$

892 where Eq. (35) follows from Assumption 4 and  $\Pr[\mathbf{p}_Z \in \mathcal{P}_\Theta] \geq 1 - \tau/4$ . Next, for  $p \in [1, \infty)$ ,

893 by Assumption 4,  $\left\| \theta_Z - \theta_{\hat{Z}} \right\|_p^p \geq \frac{4^p \gamma^p}{\tau k} \sum_{i=1}^k \mathbf{1}\{Z_i \neq \hat{Z}_i\}$ . Combining with Eq. (36) this shows  
894 that  $\frac{1}{\tau k} \sum_{i=1}^k \Pr[Z_i \neq \hat{Z}_i] \leq \frac{3}{4}$ .

895 Furthermore, since the Markov relation  $Z_i - (Y^n, U) - \hat{Z}_i$  holds for all  $i$ , we can lower bound  
896  $\Pr[Z_i \neq \hat{Z}_i]$  using the standard relation between total variation distance and hypothesis testing as  
897 follows, using that  $\tau \leq 1/2$  in the second inequality:

$$\begin{aligned} \Pr[Z_i \neq \hat{Z}_i] &\geq \tau \Pr[\hat{Z}_i = -1 \mid Z_i = 1] + (1 - \tau) \Pr[\hat{Z}_i = 1 \mid Z_i = -1] \\ &\geq \tau \left( \Pr[\hat{Z}_i = -1 \mid Z_i = 1] + \Pr[\hat{Z}_i = 1 \mid Z_i = -1] \right) \\ &\geq \tau \left( 1 - d_{\text{TV}}(\mathbf{p}_{+i}^{Y^n}, \mathbf{p}_{-i}^{Y^n}) \right). \end{aligned}$$

898 Summing over  $1 \leq i \leq k$  and combining it with the previous bound, we obtain

$$\frac{3}{4} \geq \frac{1}{\tau k} \sum_{i=1}^k \Pr[Z_i \neq \hat{Z}_i] \geq 1 - \frac{1}{k} \sum_{i=1}^k d_{\text{TV}}(\mathbf{p}_{+i}^{Y^n}, \mathbf{p}_{-i}^{Y^n})$$

899 and reorganizing proves the result.

## 900 **G Missing statements and proofs in Section 5**

### 901 **G.1 Proof of Theorem 3**

902 Fix  $p \in [1, \infty)$ . Let  $k = d$ ,  $\mathcal{Z} = \{-1, +1\}^d$ , and  $\tau = \frac{s}{2d}$ ; and suppose that, for some  $\gamma \in (0, 1/8]$ ,  
903 there exists an  $(n, \gamma)$ -estimator for  $\mathcal{B}_{d,s}$  under  $\ell_p$  loss. We fix a parameter  $\gamma \in (0, 1/2]$ , which will be  
904 chosen as a function of  $\gamma, d, p$  later. Consider the set of  $2^d$  product Bernoulli distributions  $\{\mathbf{p}_z\}_{z \in \mathcal{Z}}$ ,  
905 where  $\mu(\mathbf{p}_z) = \mu_z := \frac{1}{2} \gamma (z + \mathbf{1}_d)$  (so the sparsity of the mean vector is equal to the number of  
906 positive coordinates of  $z$ ). We have, for  $z \in \mathcal{Z}$ ,

$$\mathbf{p}_z(x) = \frac{1}{2^d} \prod_{i=1}^d \left( 1 + \frac{1}{2} \gamma (z_i + 1) x_i \right), \quad x \in \mathcal{X}.$$

907 It follows for  $z \in \mathcal{Z}$  and  $i \in [d]$  that

$$\mathbf{p}_{z \oplus i}(x) = \frac{1 + \frac{1}{2}\gamma(1 - z_i)x_i}{1 + \frac{1}{2}\gamma(1 + z_i)x_i} \mathbf{p}_z(x) = \left(1 - \gamma \frac{z_i x_i}{1 + \frac{1}{2}\gamma(1 + z_i)x_i}\right) \mathbf{p}_z(x) = (1 + \phi_{z,i}(x)) \mathbf{p}_z(x) \quad (37)$$

908 where  $\phi_{z,i}(x) := -\frac{\gamma z_i x_i}{1 + \frac{1}{2}\gamma(1 + z_i)x_i}$ . We can verify that, for  $i \neq j$ ,

$$\mathbb{E}_{\mathbf{p}_z}[\phi_{z,i}(X)] = 0, \quad \mathbb{E}_{\mathbf{p}_z}[\phi_{z,i}(X)^2] = \frac{\gamma^2}{1 - \frac{1}{2}\gamma^2(1 + z_i)}, \quad \text{and } \mathbb{E}_{\mathbf{p}_z}[\phi_{z,i}(X)\phi_{z,j}(X)] = 0,$$

909 so that Assumptions 1 and 2 are satisfied for  $\alpha^2 := 2\gamma^2$ . Moreover, using, e.g., Hoeffding's  
 910 lemma (cf. [9]), for  $\gamma < 1$ , the random vector  $\phi_z(X) = (\phi_{z,i}(X))_{i \in [d]}$  is  $\frac{\gamma^2}{(1 - \gamma^2)^2}$ -subgaussian.  
 911 Thus, Assumption 3 holds as well, and we can invoke both parts of Theorem 2.

912 Let  $\|z\|_+ := |\{i \in [d] \mid z_i = 1\}|$ , so that  $\|\mu_z\|_0 = \sum_{i=1}^d \frac{1}{2}(1 + z_i) = \|z\|_+$ . The next claim, which  
 913 follows from standard bounds for binomial random variables, states that when  $Z \sim \text{Rad}(\tau)^{\otimes d}$ ,  $\mu_Z$  is  
 914  $s$ -sparse with high probability.

915 **Fact 2.** Let  $Z \sim \text{Rad}(\tau)^{\otimes d}$ , where  $\tau d \geq 4 \log d$ . Then  $\Pr[\|Z\|_+ \leq 2\tau d] \geq 1 - \tau/4$ .

916 Hence the construction satisfies  $\Pr_Z[\mathbf{p}_Z \in \mathcal{B}_{d,s}] \leq 1 - \tau/4$ , as required in Lemma 1.

917 We now choose  $\gamma = \gamma(p) := \frac{4\gamma}{(s/2)^{1/p}} \in (0, 1/2]$ , which implies that Assumption 4 holds since

$$\ell_p(\mu(\mathbf{p}_z), \mu(\mathbf{p}_{z'})) = \gamma d_{\text{Ham}}(z, z')^{1/p} = 4\gamma \left( \frac{d_{\text{Ham}}(z, z')}{\tau d} \right)^{1/p}.$$

918 Therefore, we can apply Lemma 1 as well. For  $\mathcal{W}^{\text{priv}, \varepsilon}$ , we prove the two parts of the lower bound  
 919 separately, depending on whether  $\varepsilon \leq 1$ . First, upon combining the bounds obtained by Corollary 1  
 920 and Lemma 1 (specifically, for the former, (6)), we get

$$d \leq 112n\alpha^2(e^\varepsilon - 1)^2,$$

921 whereby, upon recalling that  $\alpha^2 = 2\gamma^2$ , and using the value of  $\gamma = \gamma(p)$  above, it follows that

$$\frac{1}{3584} \cdot \frac{d(s/2)^{\frac{2}{p}}}{n(e^\varepsilon - 1)^2} \leq \gamma^2.$$

922 Thus,  $\mathcal{E}_p(\mathcal{B}_{d,s}, \mathcal{W}^{\text{priv}, \varepsilon}, n) = \Omega\left(\sqrt{\frac{ds^{2/p}}{n\varepsilon^2}}\right)$  for  $\varepsilon \in (0, 1]$ . For the second part of the bound, which  
 923 dominates for  $\varepsilon > 1$ , observe that Assumption 3 holds with  $\sigma^2 := \frac{\gamma^2}{(1 - \gamma^2)^2} \leq 2\gamma^2$ ; allowing us to  
 924 apply the second part of Corollary 1, (7), which as before combined with Lemma 1 yields

$$d \leq 224n\sigma^2\varepsilon \leq 448n\gamma^2\varepsilon,$$

925 and again from the setting of  $\gamma$  we get  $\mathcal{E}_p(\mathcal{B}_{d,s}, \mathcal{W}^{\text{priv}, \varepsilon}, n) = \Omega\left(\sqrt{\frac{ds^{2/p}}{n\varepsilon}}\right)$ .

926 Similarly, for  $\mathcal{W}^{\text{comm}, \ell}$ , again since Assumption 3 holds with  $\sigma^2 \leq 2\gamma^2$ , upon combining the bounds  
 927 obtained by Corollary 2 and Lemma 1, we get

$$\frac{ds^{\frac{2}{p}}}{28672n\ell} \leq \gamma^2,$$

928 which gives  $\mathcal{E}_p(\mathcal{B}_{d,s}, \mathcal{W}^{\text{comm}, \ell}, n) = \Omega\left(\sqrt{\frac{ds^{2/p}}{n\ell}} \wedge 1\right)$ . Finally, note that for  $\ell \geq d$ , the lower  
 929 bound follows from the minimax rate in the unconstrained setting, which can be seen to be  
 930  $\Omega(\sqrt{s^{2/p} \log(2d/s)/n})$  [28, 30]. This completes the proof.

931 This handles the case  $p \in [1, \infty)$ . For  $p = \infty$ , the lower bounds immediately follow from plugging  
 932  $p = \log s$  in the previous expressions, as discussed in Footnote 3.

## G.2 Detailed results for Gaussian family

Similar to the previous section, we denote the mean by  $\mu$  instead of  $\theta$ , denote the estimator by  $\hat{\mu}$ , and consider the minimax error rate  $\mathcal{E}_p(\mathcal{G}_{d,s}, \mathcal{W}, n)$  of mean estimation for  $\mathcal{P}_\Theta = \mathcal{G}_{d,s}$  using  $\mathcal{W}$  under  $\ell_p$  loss.

We derive a lower bound for  $\mathcal{E}_p(\mathcal{G}_{d,s}, \mathcal{W}, n)$  under local privacy (captured by  $\mathcal{W} = \mathcal{W}^{\text{priv}, \varepsilon}$ ) and communication (captured by  $\mathcal{W} = \mathcal{W}^{\text{comm}, \ell}$ ) constraints.<sup>9</sup> Recall that for product Bernoulli mean estimation we had optimal bounds for both privacy and communication constraints for all finite  $p$ . For Gaussians, we will obtain tight bounds for privacy constraints for  $\varepsilon \in (0, 1]$ . However, for communication constraints and privacy constraints when  $\varepsilon \geq 1$ , our bounds for Gaussian distributions are tight only in specific regimes of  $n$  up to logarithmic factors. We state our general result and provide some remarks before providing the proofs.

We defer the estimation schemes and their analysis (*i.e.*, upper bounds) to the Supplement (Appendix C.2); they follow from a simple reduction from the Gaussian estimation problem to the product Bernoulli one, which enables us to invoke the protocols for the latter task in both the communication-constrained and locally private settings.

**Theorem 5.** Fix  $p \in [1, \infty)$ . For  $4 \log d \leq s \leq d$ , under LDP constraints, when  $\varepsilon \in (0, 1]$ ,

$$\sqrt{\frac{ds^{2/p}}{n\varepsilon^2}} \wedge 1 \lesssim \mathcal{E}_p(\mathcal{G}_{d,s}, \mathcal{W}^{\text{priv}, \varepsilon}, n) \lesssim \sqrt{\frac{ds^{2/p}}{n\varepsilon^2}} \quad (38)$$

and when  $\varepsilon > 1$ ,

$$\sqrt{\frac{ds^{2/p}}{n\varepsilon \log(nd)}} \vee \frac{s^{2/p} \log \frac{2d}{s}}{n} \wedge 1 \lesssim \mathcal{E}_p(\mathcal{G}_{d,s}, \mathcal{W}^{\text{priv}, \varepsilon}, n) \lesssim \sqrt{\frac{ds^{2/p}}{n\varepsilon}} \vee \frac{s^{2/p} \log \frac{2d}{s}}{n} \quad (39)$$

Under communication constraints,

$$\sqrt{\frac{ds^{2/p}}{n\ell \log(dn)}} \vee \frac{s^{2/p} \log \frac{2d}{s}}{n} \wedge 1 \lesssim \mathcal{E}_p(\mathcal{G}_{d,s}, \mathcal{W}^{\text{comm}, \ell}, n) \lesssim \sqrt{\frac{ds^{2/p}}{n\ell}} \vee \frac{s^{2/p} \log \frac{2d}{s}}{n} \quad (40)$$

For  $p = \infty$ , we have the upper bounds

$$\mathcal{E}_\infty(\mathcal{G}_{d,s}, \mathcal{W}^{\text{priv}, \varepsilon}, n) = O\left(\sqrt{\frac{d \log s}{n\varepsilon^2}}\right) \quad \text{and} \quad \mathcal{E}_\infty(\mathcal{G}_{d,s}, \mathcal{W}^{\text{comm}, \ell}, n) = O\left(\sqrt{\frac{d \log s}{n\ell}} \vee \frac{\log d}{n}\right),$$

while the lower bounds given in Eqs. (38), (39), and (40) hold for  $p = \infty$ , too.<sup>10</sup>

We emphasize that, as discussed in Sections 1.1 and 1.2, to the best of our knowledge Theorem 5 provides the first lower bounds for interactive Gaussian mean estimation under communication and privacy constraints.

*Proof of Theorem 5.* Let  $\varphi$  denote the probability density function of the standard Gaussian distribution  $\mathcal{G}(\mathbf{0}, \mathbb{I})$ . Fix  $p \in [1, \infty)$ . Let  $k = d$ ,  $\mathcal{Z} = \{-1, +1\}^d$ , and  $\tau = \frac{s}{2d}$ ; and suppose that, for some  $\gamma \in (0, 1/8]$ , there exists an  $(n, \gamma)$ -estimator for  $\mathcal{G}_{d,s}$  under  $\ell_p$  loss. We fix a parameter  $\gamma := \gamma(p) := \frac{4\gamma}{(s/2)^{1/p}} \in (0, 1/2]$ , and consider the set of distributions  $\{\mathbf{p}_z\}_{z \in \mathcal{Z}}$  of all  $2^d$  spherical Gaussian distributions with mean  $\mu_z := \gamma(z + \mathbf{1}_d)$ , where  $z \in \mathcal{Z}$ . Again, note that  $\|\mu_z\|_0 = \sum_{i=1}^d \mathbb{1}\{z_i = 1\} = \|z\|_+$ , and Fact 2 applies here too. Then by the definition of Gaussian density, for  $z \in \mathcal{Z}$ ,

$$\mathbf{p}_z(x) = e^{-\gamma^2 \|\mu_z\|_2^2 / 2} \cdot e^{\gamma \langle x, z + \mathbf{1}_d \rangle} \cdot \varphi(x). \quad (41)$$

Therefore, for  $z \in \mathcal{Z}$  and  $i \in [d]$ , we have

$$\mathbf{p}_{z \oplus i}(x) = e^{-2\gamma x_i z_i} e^{2\gamma^2 z_i} \cdot \mathbf{p}_z(x) = (1 + \phi_{z,i}(x)) \cdot \mathbf{p}_z(x), \quad (42)$$

<sup>9</sup>As in the Bernoulli case, we here focus for simplicity on the case where the communication (resp., privacy) parameters are the same for all players, but our lower bounds easily extend.

<sup>10</sup>That is, the upper and lower bounds only differ by a  $\log s$  factor for  $p = \infty$  in the privacy case.

964 where  $\phi_{z,i}(x) := 1 - e^{-2\gamma x_i z_i} e^{2\gamma^2 z_i}$ . By using the Gaussian moment-generating function, for  $i \neq j$ ,

$$\mathbb{E}_{\mathbf{p}_z}[\phi_{z,i}(X)] = 0, \quad \mathbb{E}_{\mathbf{p}_z}[\phi_{z,i}(X)^2] = e^{4\gamma^2} - 1, \text{ and } \mathbb{E}_{\mathbf{p}_z}[\phi_{z,i}(X)\phi_{z,j}(X)] = 0,$$

965 so that Assumptions 1 and 2 are satisfied for  $\alpha^2 := e^{4\gamma^2} - 1$ . By our choice of  $\gamma$  and the assumption  
966 on  $\gamma$ , one can check that Assumption 4 holds:

$$\ell_p(\mu(\mathbf{p}_z), \mu(\mathbf{p}_{z'})) = 4\gamma \left( \frac{d_{\text{Ham}}(z, z')}{\tau d} \right)^{1/p}.$$

967 Moreover, similar to the product of Bernoulli case, using Fact 2, we can show that  $\Pr_Z[\mathbf{p}_Z \in \mathcal{G}_{d,s}] \leq$   
968  $1 - \tau/4$ . This allows us to apply Lemma 1.

### 969 G.2.1 Privacy constraints for $\varepsilon \in (0, 1)$

970 For  $\mathcal{W}^{\text{priv}, \varepsilon}$ , upon combining the bounds obtained by Corollary 1 and Lemma 1, we get

$$d \leq 112n\alpha^2(e^\varepsilon - 1)^2,$$

971 whereby, upon noting that  $\alpha^2 = e^{4\gamma^2} - 1 \leq 8\gamma^2$  holds since  $\gamma \leq 1/2$ , and using the value of  
972  $\gamma = \gamma(p)$  above, it follows that

$$\gamma^2 \geq \frac{d(s/2)^{\frac{2}{p}}}{14336 \cdot n(e^\varepsilon - 1)^2}.$$

973 Thus,  $\mathcal{E}_p(\mathcal{G}_{d,s}, \mathcal{W}^{\text{priv}, \varepsilon}, n) = \Omega\left(\sqrt{\frac{ds^{2/p}}{n\varepsilon^2}} \wedge 1\right)$ . This establishes the lower bounds for  $\mathcal{W}^{\text{priv}, \varepsilon}$ .

974 (Recall that the bound for  $p = \infty$  then follows from setting  $p = \log d$ .)

### 975 G.2.2 Communication constraints, and privacy constraints for $\varepsilon \geq 1$

976 For these cases, to prove a lower bound with the desired dependence on  $\varepsilon$  or  $\ell$ , we will need to use  
977 the tighter bounds in Corollaries 1 and 2 which hold only under Assumption 3. This, however, leads  
978 to an issue: the random vector  $\phi_z(X) = (\phi_{z,i}(X))_{i \in [d]}$  is not subgaussian, due to the one-sided  
979 exponential growth, and therefore Assumption 3 does not hold.

980 To overcome this and still obtain a linear dependence on  $\ell$  (or  $\varepsilon$ ) (instead of the suboptimal  $2^\ell$  (or  
981  $e^\varepsilon$ )), we will consider instead the class of “truncated” Gaussian distributions, whose corresponding  $\phi$   
982 functions are subgaussian; and argue that these truncated distributions are close enough to the original  
983 Gaussian distributions such a lower bound in the truncated case implies one in the original Gaussian  
984 case.

985 In particular, we consider the following collection of truncated Gaussian distributions. For  $z \in \mathcal{Z}$ , let  
986  $\mathbf{p}_z$  be the density function of a spherical Gaussian distribution with mean  $\mu_z$  as defined in Eq. (41).  
987 For a truncation bound  $B$ , let  $\mathbf{p}_{z,B}$  be the distribution of  $X \sim \mathbf{p}_z$  conditioned on the event that  
988  $\|X\|_\infty \leq B$ . That is, we have, for  $x \in \mathbb{R}^d$ ,

$$\mathbf{p}_{z,B}(x) = C_z \mathbf{p}_z(x) \mathbb{1}\{\|X\|_\infty \leq B\},$$

989 where  $C_z = 1/\Pr_{X \sim \mathbf{p}_z}[\|X\|_\infty \leq B]$ . Then the following bound follows from standard Gaussian  
990 concentration bound on each dimension and a union bound over all dimensions.

991 **Fact 3.** *Setting  $B := 4\sqrt{\ln(dn)}$ , we have, for every  $z \in \mathcal{Z}$ ,  $d_{\text{TV}}(\mathbf{p}_{z,B}, \mathbf{p}_z) \leq \frac{1}{d^{7/8}n^8}$ .*

992 Let  $\mathbf{p}_{z,B}^{Y^n}$  be the distribution of the messages obtained by executing the protocol when each user gets a  
993 sample from  $\mathbf{p}_{z,B}$  and let the corresponding mixtures be denoted by  $\mathbf{p}_{+,B}^{Y^n}$  and  $\mathbf{p}_{-,B}^{Y^n}$ . Then we have

$$\begin{aligned} d_{\text{TV}}(\mathbf{p}_{+,B}^{Y^n}, \mathbf{p}_{-,B}^{Y^n}) &\leq d_{\text{TV}}(\mathbf{p}_{+,B}^{Y^n}, \mathbf{p}_{-,B}^{Y^n}) + d_{\text{TV}}(\mathbf{p}_{+,B}^{Y^n}, \mathbf{p}_{+,B}^{Y^n}) + d_{\text{TV}}(\mathbf{p}_{-,B}^{Y^n}, \mathbf{p}_{-,B}^{Y^n}) \\ &\leq d_{\text{TV}}(\mathbf{p}_{+,B}^{Y^n}, \mathbf{p}_{-,B}^{Y^n}) + \max_z \left\{ d_{\text{TV}}(\mathbf{p}_z^{Y^n}, \mathbf{p}_{z,B}^{Y^n}) + d_{\text{TV}}(\mathbf{p}_{z,B}^{Y^n}, \mathbf{p}_z^{Y^n}) \right\} \\ &\leq d_{\text{TV}}(\mathbf{p}_{+,B}^{Y^n}, \mathbf{p}_{-,B}^{Y^n}) + 2 \max_z d_{\text{TV}}(\mathbf{p}_{z,B}^{\otimes n}, \mathbf{p}_z^{\otimes n}) \\ &\leq d_{\text{TV}}(\mathbf{p}_{+,B}^{Y^n}, \mathbf{p}_{-,B}^{Y^n}) + 2n \max_z d_{\text{TV}}(\mathbf{p}_{z,B}, \mathbf{p}_z) \\ &\leq d_{\text{TV}}(\mathbf{p}_{+,B}^{Y^n}, \mathbf{p}_{-,B}^{Y^n}) + \frac{2}{d^{7/8}n^7}. \end{aligned}$$

994 The third inequality follows from data processing inequality and the fourth inequality follows from  
 995 subadditivity of TV distance.

996 Combining this with Lemma 1, for any protocol that correctly learns the Gaussian family, we must  
 997 have

$$\frac{1}{d} \sum_{i=1}^d d_{\text{TV}}(\mathbf{p}_{+,B}^{Y^n}, \mathbf{p}_{-,B}^{Y^n}) \geq \frac{1}{8}. \quad (43)$$

998 Next we show that the  $\phi$  functions corresponding to  $\mathbf{p}_{z,B}$ 's are subgaussian and establish the  
 999 corresponding upper bounds on the average information bound above. Note that

$$\phi_{z,i}^B(x) := \frac{\mathbf{p}_{z \oplus i}^B(x)}{\mathbf{p}_z^B(x)} - 1 = \frac{C_{z \oplus i}}{C_z} e^{-2\gamma x_i z_i} e^{2\gamma^2 z_i} \mathbb{1}\{\|x\|_\infty \leq B\} - 1 \quad (44)$$

1000 By the inequality  $|ab - 1| \leq |a| \cdot |b - 1| + |a - 1|$ , we have have, for all  $z \in \mathcal{Z}$ ,

$$\begin{aligned} \left| \frac{C_{z \oplus i}}{C_z} - 1 \right| &\leq \frac{1}{C_z} |C_{z \oplus i} - 1| + \left| \frac{1}{C_z} - 1 \right| \leq \left| \frac{1}{\Pr_{X \sim \mathbf{p}_{z \oplus i}}[\|X\|_\infty \leq B]} - 1 \right| + \left| \frac{\Pr_{X \sim \mathbf{p}_z}[\|X\|_\infty \leq B] - 1}{\Pr_{X \sim \mathbf{p}_{z \oplus i}}[\|X\|_\infty \leq B]} \right| \\ &\leq \frac{10}{d^\tau n^\tau}. \end{aligned}$$

1001 Moreover, for all  $z \in \mathcal{Z}$ , for  $\gamma \leq \frac{1}{3B}$ ,

$$\left| e^{-2\gamma x_i z_i} e^{2\gamma^2 z_i} \mathbb{1}\{\|x\|_\infty \leq B\} - 1 \right| \leq \left| e^{2\gamma^2 + 2\gamma B} - 1 \right| \leq |e^{3\gamma B} - 1| \leq 6\gamma B. \quad (45)$$

1002 Hence, applying the inequality  $|ab - 1| \leq |a| \cdot |b - 1| + |a - 1|$  again on Eq. (44), we have for  
 1003  $\gamma \leq \frac{1}{3B}$ ,

$$|\phi_{z,i}^B(x)| \leq 12\gamma B + \frac{10}{d^\tau n^\tau}.$$

1004 Thus, we get that for all  $z \in \mathcal{Z}, i \in [d]$ ,  $\phi_{z,i}^B$  is subgaussian with proxy  $\sigma_B = 12\gamma B + \frac{10}{d^\tau n^\tau}$ .

1005 Under communication constraints, applying Corollary 2, we get

$$\left( \frac{1}{d} \sum_{i=1}^d d_{\text{TV}}(\mathbf{p}_{+,B}^{Y^n}, \mathbf{p}_{-,B}^{Y^n}) \right)^2 \leq \frac{14}{d} \sigma_B^2 n \ell.$$

1006 To conclude, we observe that by plugging our setting of  $\gamma = \gamma(p)$  in the above inequality, we must  
 1007 have

$$\gamma^2 \geq \frac{d(s/2)^{\frac{2}{p}}}{14336 \cdot n \cdot B^2 \ell}$$

1008 in order to satisfy Eq. (43), hence proving the desired lower bound. The lower bound for LDP with  
 1009  $\varepsilon > 1$  follows similarly by applying Corollary 1.  $\square$

### 1010 G.3 Detailed results for discrete family

1011 We derive a lower bound for  $\mathcal{E}_p(\Delta_d, \mathcal{W}, n)$ , the minimax rate for discrete density estimation, under  
 1012 local privacy and communication constraints.

1013 **Theorem 6.** Fix  $p \in [1, \infty)$ . For  $\varepsilon > 0$ , and  $\ell \geq 1$ , we have

$$\mathcal{E}_p(\Delta_d, \mathcal{W}^{\text{priv}, \varepsilon}, n) \gtrsim \sqrt{\frac{d^{2/p}}{n((e^\varepsilon - 1)^2 \wedge e^\varepsilon)}} \wedge \left( \frac{1}{n((e^\varepsilon - 1)^2 \wedge e^\varepsilon)} \right)^{\frac{p-1}{p}} \wedge 1 \quad (46)$$

1014 and

$$\mathcal{E}_p(\Delta_d, \mathcal{W}^{\text{comm}, \ell}, n) \gtrsim \sqrt{\frac{d^{2/p}}{n2^\ell}} \wedge \left( \frac{1}{n2^\ell} \right)^{\frac{p-1}{p}} \wedge 1. \quad (47)$$

1015 In particular, for  $n((e^\varepsilon - 1)^2 \wedge e^\varepsilon) \geq d^2$  and  $n(2^\ell \wedge d) \geq d^2$ , the first term of the corresponding  
 1016 lower bounds dominates. Before turning to the proof of this theorem, we note that Corollary 3 and  
 1017 Corollary 4 are direct corollaries of the theorem.

1018 We now establish Theorem 6.

1019 *Proof of Theorem 6.* Fix  $p \in [1, \infty)$ , and suppose that, for some  $\gamma \in (0, 1/16]$ , there exists an  
 1020  $(n, \gamma)$ -estimator for  $\Delta_d$  under  $\ell_p$  loss. Set

$$D := d \wedge \left\lceil \left( \frac{1}{16\gamma} \right)^{\frac{p}{p-1}} \right\rceil$$

1021 and assume, without loss of generality, that  $D$  is even. By definition, we then have  $\gamma \in$   
 1022  $(0, 1/(16D^{1-1/p})]$  and  $D \leq d$ ; we can therefore restrict ourselves to the first  $D$  elements of the  
 1023 domain, embedding  $\Delta_D$  into  $\Delta_d$ , to prove our lower bound.

1024 Let  $k = \frac{D}{2}$ ,  $\mathcal{Z} = \{-1, +1\}^{D/2}$ , and  $\tau = \frac{1}{2}$ ; and suppose that, for some  $\gamma \in (0, 1/(16D^{1-1/p})]$ ,  
 1025 there exists an  $(n, \gamma)$ -estimator for  $\Delta_D$  under  $\ell_p$  loss. (We will use the fact that  $\gamma \leq 1/(16D^{1-1/p})$   
 1026 for Eq. (49) to be a valid distribution with positive mass, as we will need  $|\gamma| \leq \frac{1}{D}$ ; and to bound  $\alpha^2$   
 1027 later on, as we will require  $|\gamma| \leq \frac{1}{2D}$ .) Define  $\gamma = \gamma(p)$  as

$$\gamma(p) := \frac{4 \cdot 2^{1/p} \gamma}{D^{1/p}}, \quad (48)$$

1028 which implies  $\gamma \in [0, 1/(2D)]$ . Consider the set of  $D$ -ary distributions  $\mathcal{P}_{\text{Discrete}}^\gamma = \{\mathbf{p}_z\}_{z \in \mathcal{Z}}$  defined  
 1029 as follows. For  $z \in \mathcal{Z}$ , and  $x \in \mathcal{X} = [D]$

$$\mathbf{p}_z(x) = \begin{cases} \frac{1}{D} + \gamma z_i, & \text{if } x = 2i, \\ \frac{1}{D} - \gamma z_i, & \text{if } x = 2i - 1. \end{cases} \quad (49)$$

1030 For  $z \in \mathcal{Z}$  and  $i \in [D/2]$ , we have

$$\begin{aligned} \mathbf{p}_{z \oplus i}(x) &= \left( 1 - \frac{2D\gamma z_i}{1 + D\gamma z_i} \mathbb{1}\{x = 2i\} + \frac{2D\gamma z_i}{1 - D\gamma z_i} \mathbb{1}\{x = 2i - 1\} \right) \mathbf{p}_z(x) \\ &= (1 + \phi_{z,i}(x)) \mathbf{p}_z(x), \end{aligned} \quad (50)$$

1031 where

$$\phi_{z,i}(x) := z_i \cdot \frac{2D\gamma}{1 - D^2\gamma^2} ((1 + D\gamma z_i) \mathbb{1}\{x = 2i - 1\} - (1 - D\gamma z_i) \mathbb{1}\{x = 2i\}).$$

1032 Once again, we can verify that for  $i \neq j$

$$\mathbb{E}_{\mathbf{p}_z}[\phi_{z,i}(X)] = 0, \quad \mathbb{E}_{\mathbf{p}_z}[\phi_{z,i}(X)^2] = \frac{8\gamma^2 D}{1 - \gamma^2 D^2}, \quad \text{and } \mathbb{E}_{\mathbf{p}_z}[\phi_{z,i}(X)\phi_{z,j}(X)] = 0,$$

1033 so that Assumptions 1 and 2 are satisfied for  $\alpha^2 := 16\gamma^2 D$  (using that  $D\gamma \leq 1/2$  to simplify the  
 1034 bound).<sup>11</sup> Thus, we can invoke the first part of Theorem 2. Note that Assumption 4 holds, since

$$1035 \ell_p(\mathbf{p}_z, \mathbf{p}_{z'}) = \gamma d_{\text{Ham}}(z, z')^{1/p} = 4\gamma \left( \frac{d_{\text{Ham}}(z, z')}{\tau D} \right)^{1/p}. \quad \text{Therefore, we can apply Lemma 1 as well.}$$

1036 For  $\mathcal{W}^{\text{priv}, \varepsilon}$ , by combining the bounds obtained by Corollary 1 and Lemma 1, we get

$$D \leq 56n\alpha^2((e^\varepsilon - 1)^2 \wedge e^\varepsilon),$$

1037 whereby, upon recalling the value of  $\alpha^2$  and using the setting of  $\gamma = \gamma(p)$  from Eq. (48), it follows  
 1038 that

$$\gamma^2 \geq \frac{D^{\frac{2}{p}}}{7168 \cdot 2^{2/p} \cdot n((e^\varepsilon - 1)^2 \wedge e^\varepsilon)} \asymp \frac{d^{2/p} \wedge \gamma^{-2/(p-1)}}{n((e^\varepsilon - 1)^2 \wedge e^\varepsilon)}.$$

1039 Thus we obtain the bound Eq. (46) as claimed.

1040 Similarly, for  $\mathcal{W}^{\text{comm}, \ell}$ , upon combining the bounds obtained by Corollary 2 and Lemma 1 and  
 1041 recalling that  $|\mathcal{Y}| = 2^\ell$ , we get

$$\gamma^2 \geq \frac{D^{\frac{2}{p}}}{7168 \cdot 2^{2/p} \cdot n2^\ell},$$

1042 which gives  $\mathcal{E}_p(\Delta_D, \mathcal{W}^{\text{comm}, \ell}, n) = \Omega\left(\sqrt{\frac{d^{2/p}}{n2^\ell}} \wedge \left(\frac{1}{n2^\ell}\right)^{\frac{p-1}{p}}\right)$ ,<sup>12</sup> concluding the proof.  $\square$

<sup>11</sup>It is worth noting that Assumption 3 will not hold for any useful choice of the subgaussianity parameter.

<sup>12</sup>Finally, note that we could replace the quantity  $2^\ell$  above by  $2^\ell \wedge d$ , or even  $2^\ell \wedge D$ , as for  $2^\ell \geq D$  there is no additional information any player can send beyond the first  $\log_2 D$  bits, which encode their full observation. However, this small improvement would lead to more cumbersome expressions, and not make any difference for the main case of interest,  $p = 1$ .
